# Supplementary material for: Low Diversity and Instability of the Sinus Microbiota over Time in Adults with Cystic Fibrosis
Source: PubMed Central journal article supplement (PMC9603634; doi:10.1128/spectrum.01251-22), 2022-09-12
Supplement: spectrum.01251-22-s0001.pdf [file spectrum.01251-22-s0001.pdf]

### Supplemental figure legends

**Figure S1. CF CRS microbial communities can be unstable, with many individuals switching between *Staphylococcus* spp. and *P. aeruginosa* at the greatest levels of relative abundance over time.** Taxa bar plots depicting the percent of each taxon measured at clinic visit dates for each of the 27 study participants for whom we sequenced one microbiota sample (top) or longitudinal (bottom) samples. Colors representing each taxa can be matched by the legend on the right. *Staphylococcus* spp. is depicted in red, *P. aeruginosa* is represented by *Pseudomonadaceae* in peach and *Pseudomonas* spp. in dark teal. The X axis values (indicated beneath each stacked bar plot) depict the days since study enrollment. Black lines were drawn over the individual bar plots to indicate the degree of microbiota dissimilarity relative to the first time point. The units of dissimilarity were measured with the Manhattan distance and are annotated on the y-axis on the right. The taxa bar plot for Patient 9 was previously published in Armbruster et al., Cell Reports 2021 and is reproduced according to the CC BY-NC-ND 4.0 license.

**Figure S2. Commensal taxa *Corynebacterium* spp. and *Dolosigranulum* spp. co-occur, whereas opportunistic pathogens *P. aeruginosa* and *Burkholderia* spp. are anticorrelated.** Depicted in bold text and with a thick black box are the coefficients for relationships among the top 15 taxa that were statistically significant after controlling for multiple comparisons (Holm-Bonferroni adjusted p-value <0.05). In non-bold black text are individual associations that were statistically significant prior to correcting for multiple hypothesis testing ( $p < 0.05$ ), but not after (Holm-Bonferroni adjusted p-value >0.05). Grey text indicates values that were not statistically significant.

**Figure S3. Characterization of cluster assignment in Figure 2. A)** The Calinski-Harabasz Pseudo-F statistic was calculated across all cluster cuts ( $k$ ) to determine the optimal numbers of cluster cuts to use in Figure 2AB. Although at  $k = 5$  cluster cuts, the clusters had the greatest inter-cluster separation, the cuts from  $k = 3$  to 7 were not statistically significantly different from each other. Ultimately, the cluster cut at  $k = 3$  was chosen because deeper cuts at  $k = 4$  or  $k = 5$  would have yielded cluster sizes too small to find statistically significant associations with the clinical or cytokine data. **B)** To determine which taxa influence the differentiation of clusters from one another (in Figure 2AB), taxa were iteratively evaluated for their contribution to pair-wise cluster separation by comparing the coefficient of determination ( $R^2$ ) with (full) and without (reduced) the taxon of interest. The x-axis annotates this calculated metric:  $\log(R^2_{\text{reduced}} / R^2_{\text{full}})$ . If excluding a taxon (reduced model) increases the separation between two clusters relative to its inclusion (full model), then it was an important clustering influencer, and the log ratio would

be  $<1$ . Log ratios greater than 1 indicate that the taxon added more noise (within cluster variance), thus reducing between cluster separation.

## Study participants with single visits

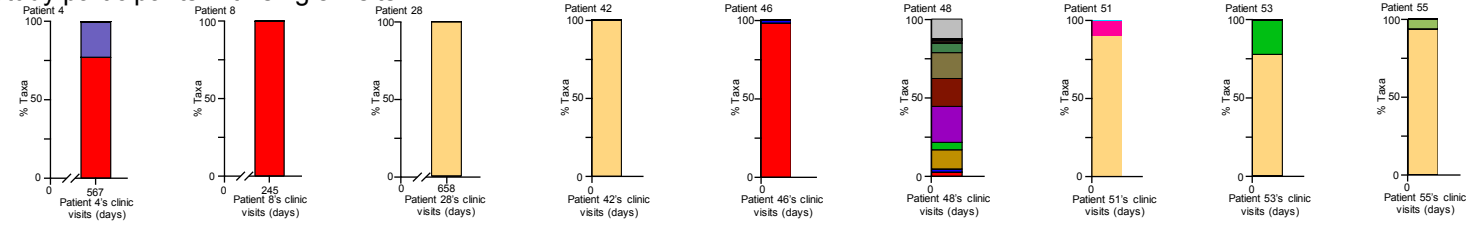

## Study participants with longitudinal visits

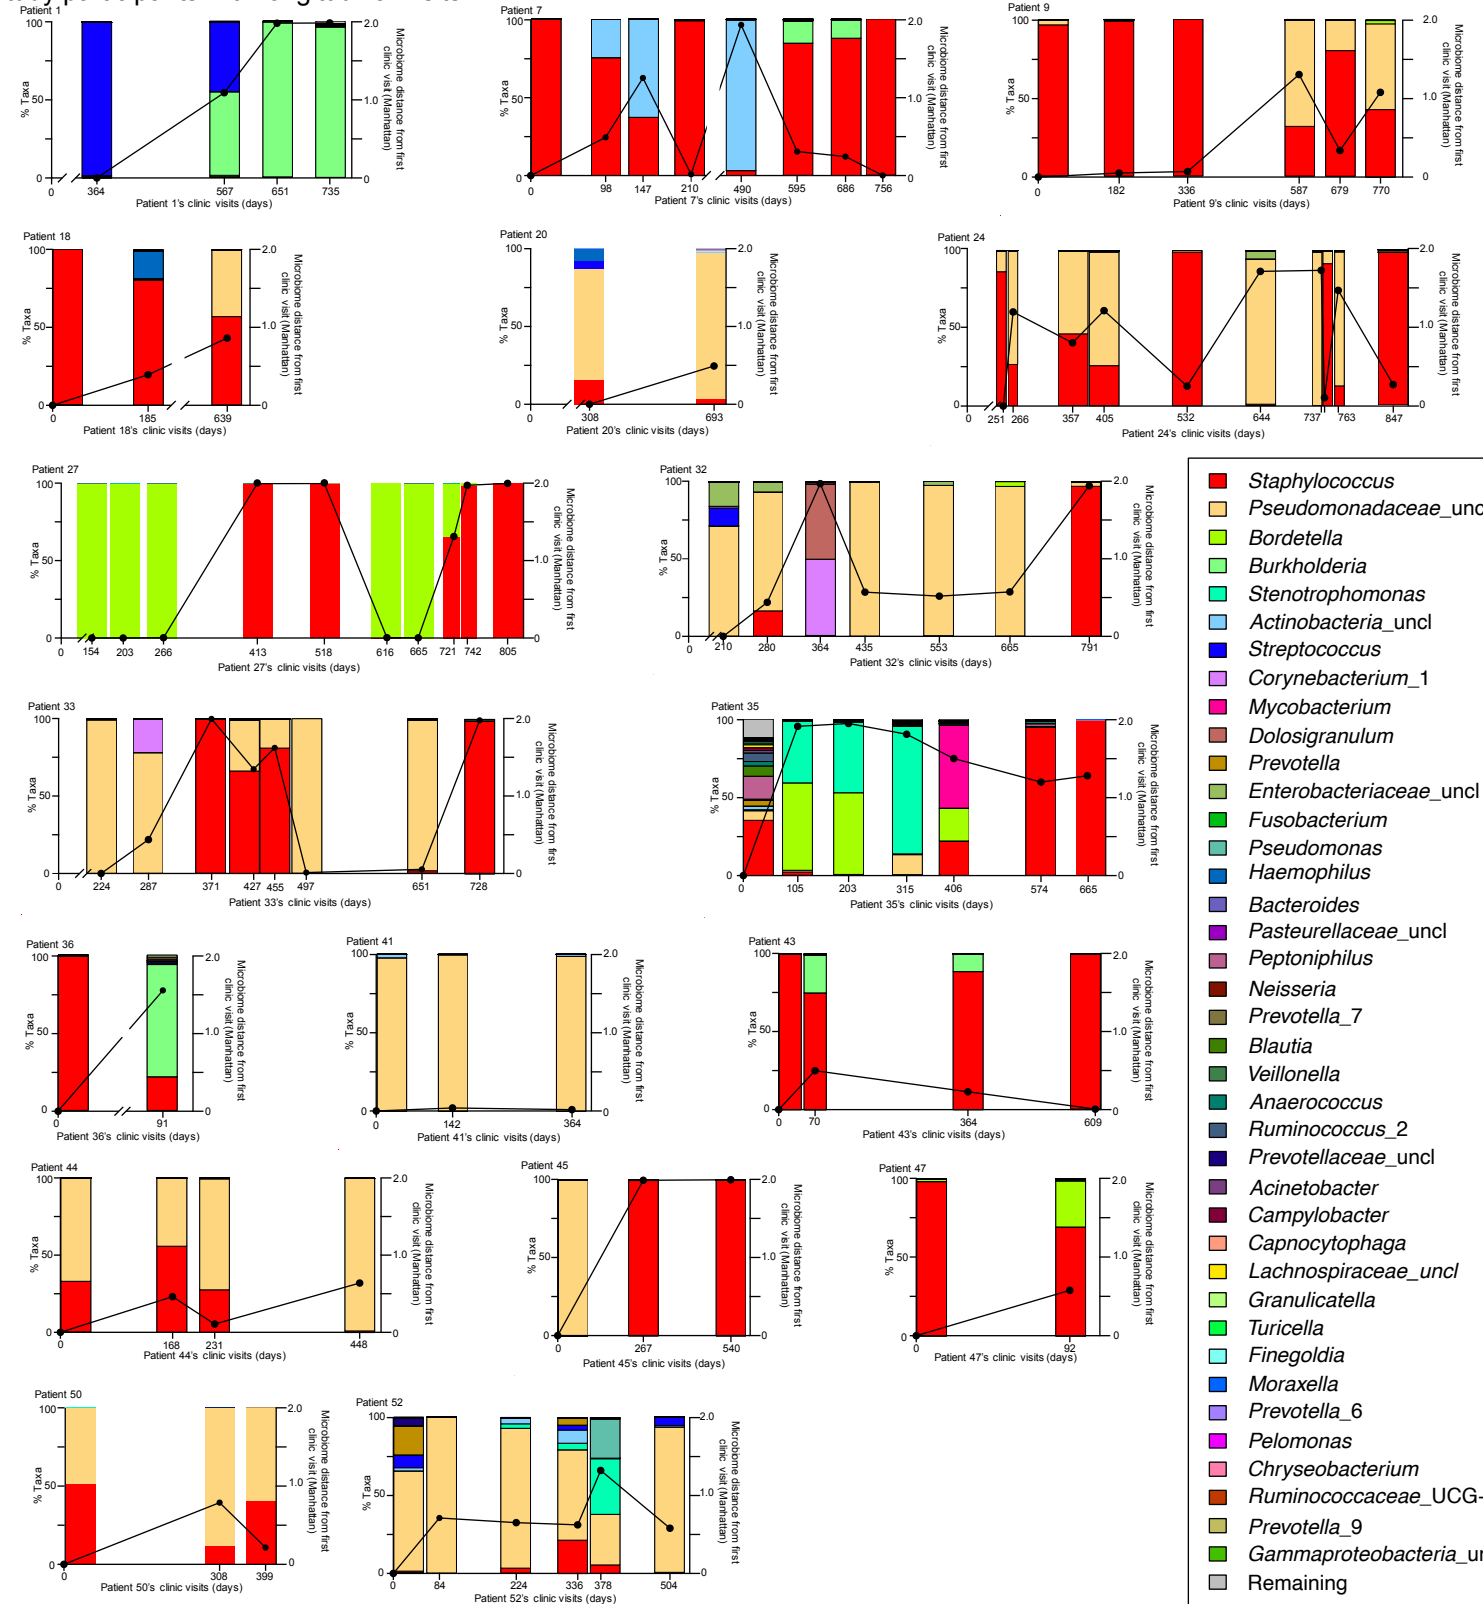

- *Staphylococcus*
- *Pseudomonadaceae\_uncl*
- *Bordetella*
- *Burkholderia*
- *Stenotrophomonas*
- *Actinobacteria\_uncl*
- *Streptococcus*
- *Corynebacterium\_1*
- *Mycobacterium*
- *Dolosigranulum*
- *Prevotella*
- *Enterobacteriaceae\_uncl*
- *Fusobacterium*
- *Pseudomonas*
- *Haemophilus*
- *Bacteroides*
- *Pasteurellaceae\_uncl*
- *Peptoniphilus*
- *Neisseria*
- *Prevotella\_7*
- *Blautia*
- *Veillonella*
- *Anaerococcus*
- *Ruminococcus\_2*
- *Prevotellaceae\_uncl*
- *Acinetobacter*
- *Campylobacter*
- *Capnocytophaga*
- *Lachnospiraceae\_uncl*
- *Granulicatella*
- *Turicella*
- *Finexgoldia*
- *Moraxella*
- *Prevotella\_6*
- *Pelomonas*
- *Chryseobacterium*
- *Ruminococcaceae\_UCG-002*
- *Prevotella\_9*
- *Gammaproteobacteria\_uncl*
- Remaining

Figure S1

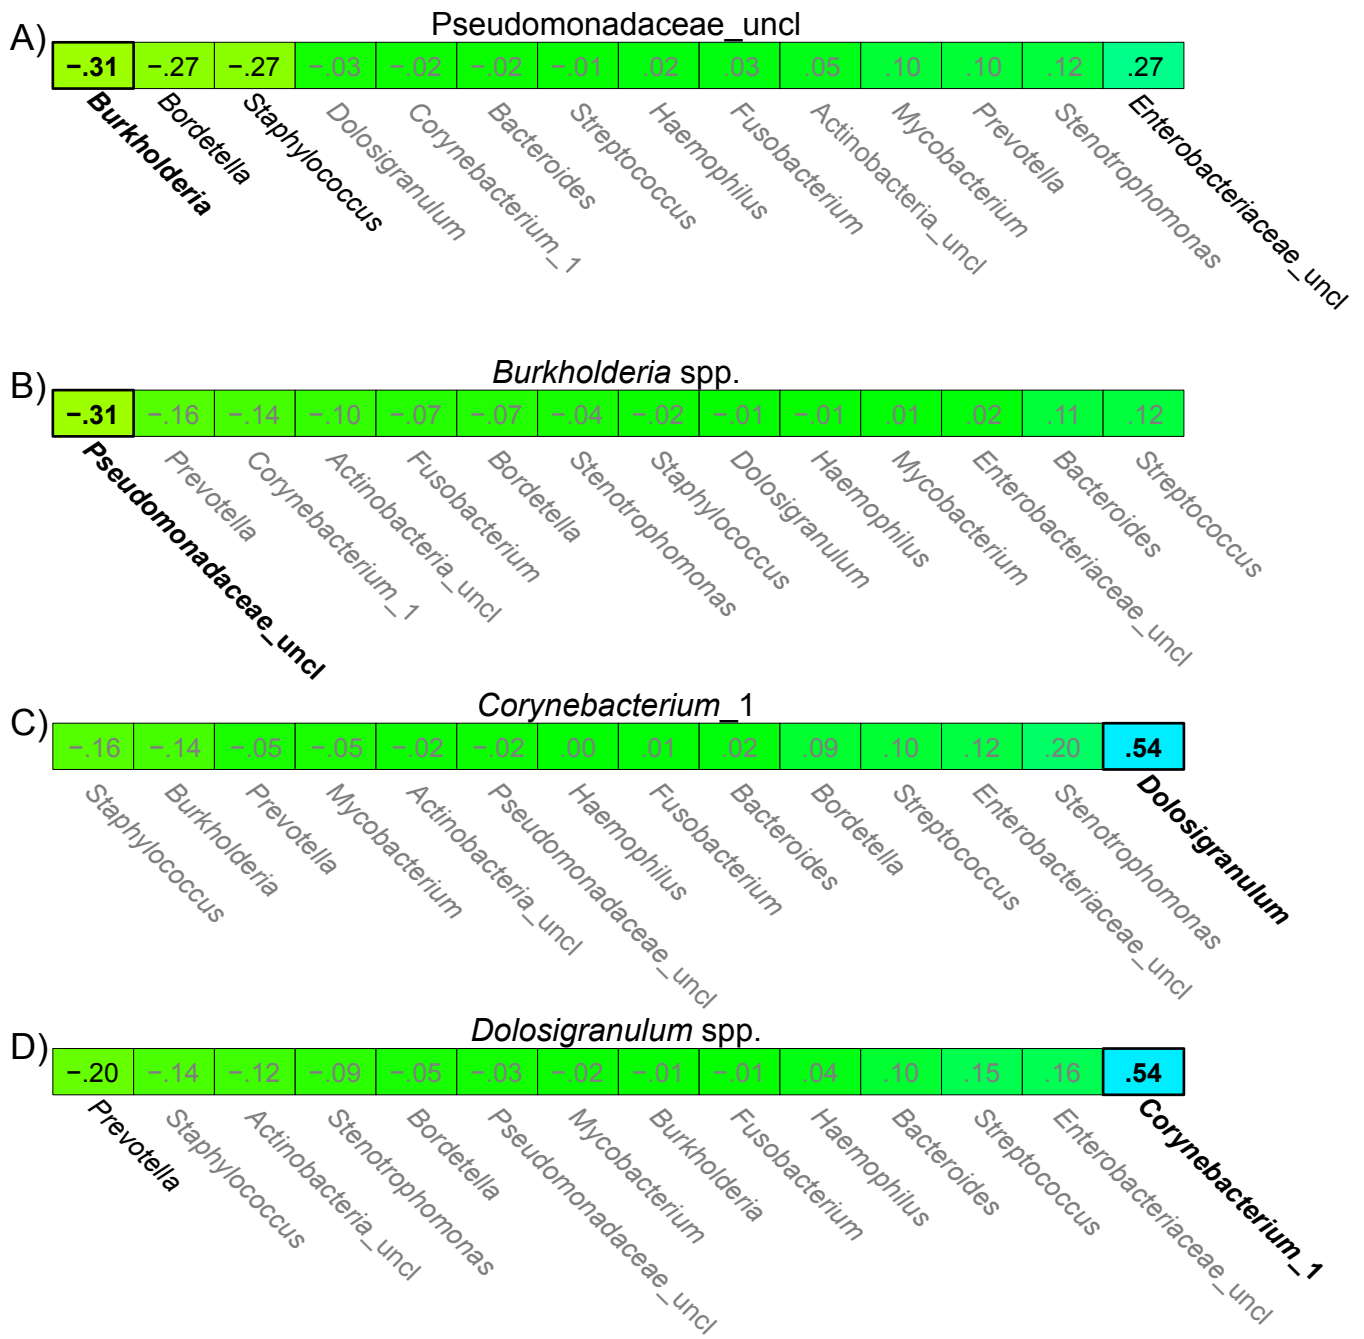

**Figure S2**

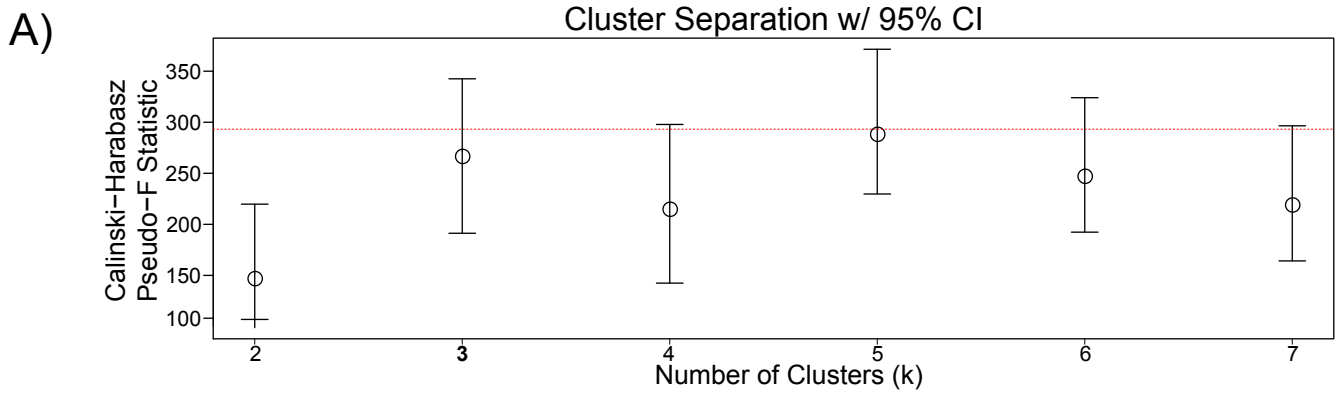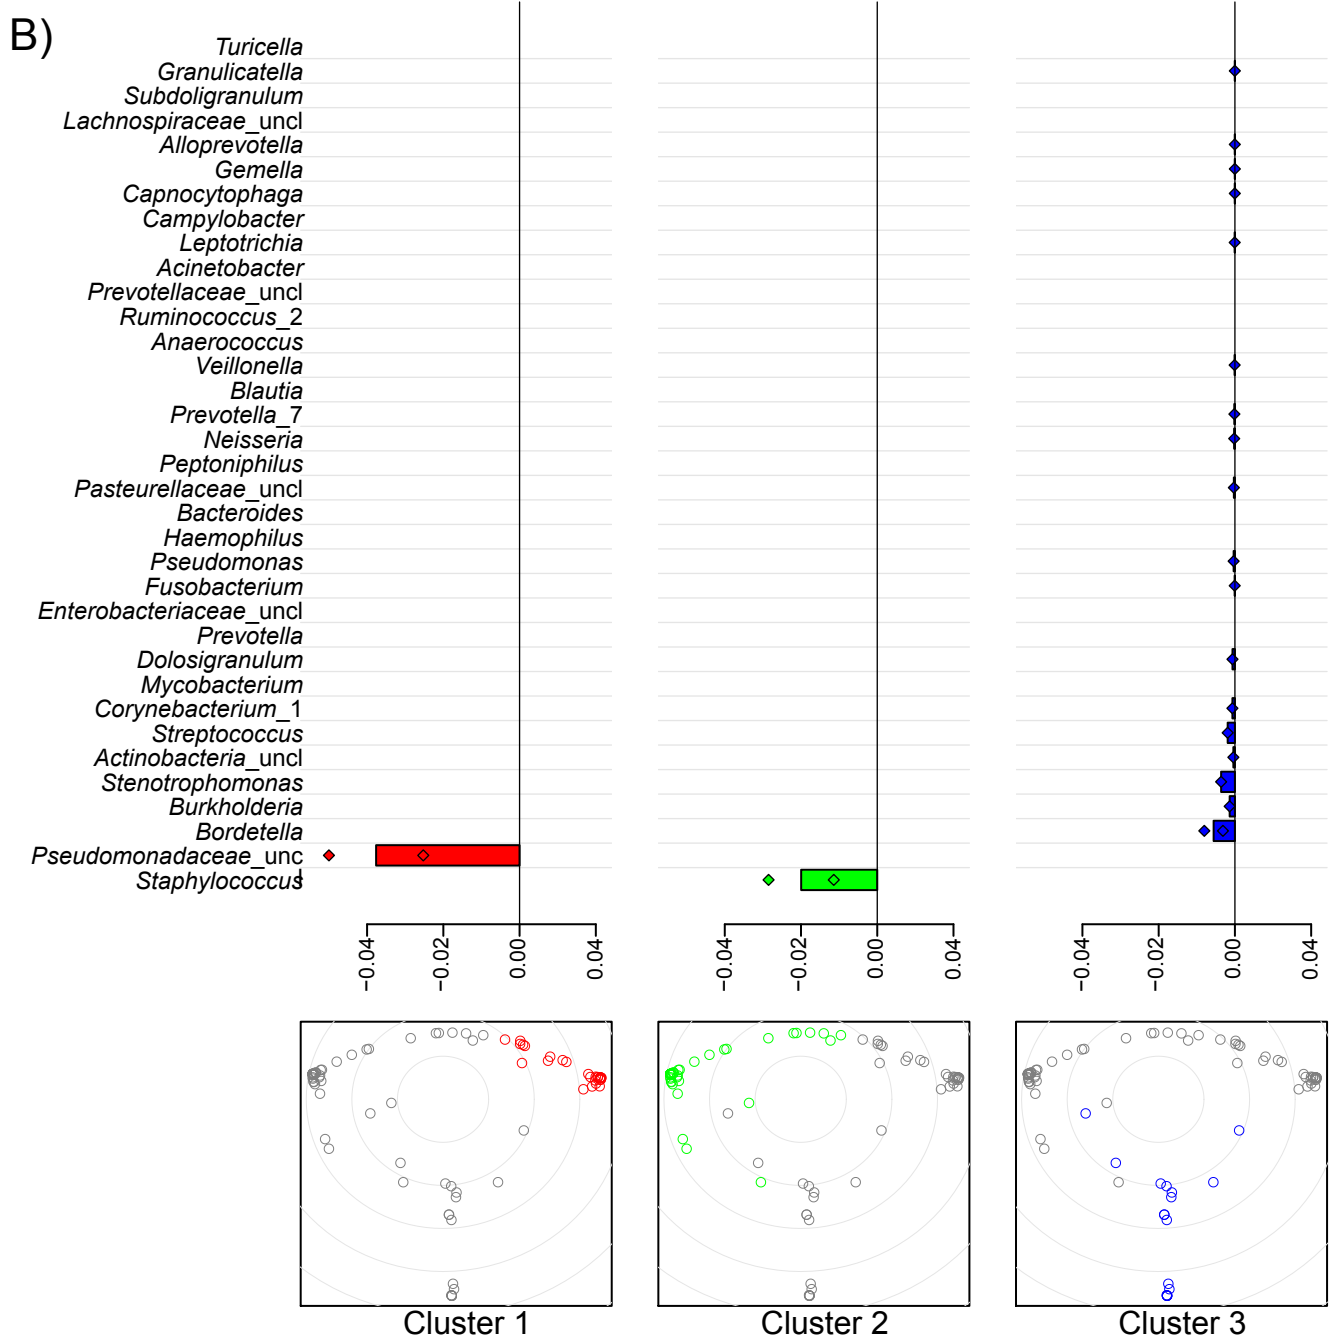

**Figure S3**

**Supplemental table 1. Diversity indices for each sequenced microbiota sample.** The sample ID numbers listed correspond to the sample ID numbers in the metadata file (Supplemental table 4).

| Sample ID        | Shannon    | Simpson    | Evenness   | Tail       | Richness |
|------------------|------------|------------|------------|------------|----------|
| 0104.01.01.SINUS | 0.10589483 | 0.03397046 | 0.05092465 | 0.287282   | 8        |
| 0104.01.02.SINUS | 0.8179829  | 0.51611268 | 0.27780603 | 1.23346473 | 19       |
| 0104.01.03.SINUS | 0.05154394 | 0.01166583 | 0.01750552 | 0.62712527 | 19       |
| 0104.01.04.SINUS | 0.23749582 | 0.06885968 | 0.08769993 | 1.23729498 | 15       |
| 0104.04.01.SINUS | 0.55157206 | 0.35447306 | 0.34271099 | 0.48696288 | 5        |
| 0104.07.01.SINUS | 0.5631518  | 0.37064178 | 0.16249126 | 0.57228765 | 32       |
| 0104.07.02.SINUS | 0.66782445 | 0.46875164 | 0.34319388 | 0.61981386 | 7        |
| 0104.07.03.SINUS | 0.07910591 | 0.01762764 | 0.0211645  | 1.57350577 | 42       |
| 0104.07.04.SINUS | 0.15674374 | 0.06603898 | 0.1426743  | 0.20127525 | 3        |
| 0104.07.05.SINUS | 0.50714676 | 0.26517697 | 0.15957777 | 0.98347694 | 24       |
| 0104.07.06.SINUS | 0.40024958 | 0.21522894 | 0.14779991 | 0.59603557 | 15       |
| 0104.07.07.SINUS | 0.0121703  | 0.00264745 | 0.00679237 | 0.11119694 | 6        |
| 0104.07.08.SINUS | 0.00778681 | 0.00148121 | 0.00324735 | 0.16889304 | 11       |
| 0104.08.01.SINUS | 0.00432632 | 0.00088028 | 0.00312078 | 0.04532762 | 4        |
| 0104.09.01.SINUS | 0.08402852 | 0.02486021 | 0.02470557 | 0.57216535 | 30       |
| 0104.09.02.SINUS | 0.00142403 | 0.00028937 | 0.00205443 | 0.01202944 | 2        |
| 0104.09.03.SINUS | 0.65588247 | 0.43865674 | 0.36605497 | 0.61119325 | 6        |
| 0104.09.04.SINUS | 0.51529151 | 0.31923503 | 0.23451927 | 0.47379282 | 9        |
| 0104.09.05.SINUS | 0.78229205 | 0.5148748  | 0.4366055  | 0.72857792 | 6        |
| 0104.09.06.SINUS | 0.19234726 | 0.06978859 | 0.0605236  | 0.93817563 | 24       |
| 0104.18.01.SINUS | 0.62057285 | 0.32374802 | 0.16939058 | 1.92072164 | 39       |
| 0104.18.02.SINUS | 0.68887458 | 0.49111112 | 0.49691797 | 0.65939088 | 4        |
| 0104.18.03.SINUS | 0.00836935 | 0.00174383 | 0.00467103 | 0.08647293 | 6        |
| 0104.20.01.SINUS | 0.89683958 | 0.46001571 | 0.40816928 | 0.98816278 | 9        |
| 0104.20.04.SINUS | 0.3885309  | 0.13060842 | 0.09652098 | 2.68572267 | 56       |
| 0104.24.01.SINUS | 0.4094465  | 0.23690178 | 0.17782036 | 0.41456201 | 10       |
| 0104.24.02.SINUS | 0.58119984 | 0.39109617 | 0.5290309  | 0.5167745  | 3        |
| 0104.24.03.SINUS | 0.7110311  | 0.50035517 | 0.44178846 | 0.69425102 | 5        |
| 0104.24.04.SINUS | 0.63897899 | 0.39483391 | 0.19850998 | 1.16587182 | 25       |
| 0104.24.05.SINUS | 0.05833955 | 0.02057431 | 0.05310295 | 0.10332065 | 3        |
| 0104.24.07.SINUS | 0.30522775 | 0.12649838 | 0.12283268 | 0.5061858  | 12       |
| 0104.24.08.SINUS | 0.29419649 | 0.15405914 | 0.21221791 | 0.29673778 | 4        |
| 0104.24.09.SINUS | 0.42659598 | 0.23561198 | 0.26505899 | 0.41326579 | 5        |
| 0104.24.10.SINUS | 0.05857163 | 0.01761035 | 0.0363926  | 0.1517269  | 5        |
| 0104.24.12.SINUS | 0.10335155 | 0.03279684 | 0.04703732 | 0.28326927 | 9        |
| 0104.27.01.SINUS | 0.01002628 | 0.00181389 | 0.00289297 | 0.40264721 | 32       |
| 0104.27.02.SINUS | 0.0079806  | 0.00161679 | 0.00410122 | 0.10310041 | 7        |
| 0104.27.03.SINUS | 0.02148301 | 0.00472933 | 0.00932995 | 0.21063452 | 10       |
| 0104.27.04.SINUS | 0.03243851 | 0.00824179 | 0.01305422 | 0.23774389 | 12       |
| 0104.27.05.SINUS | 0.0210052  | 0.00565583 | 0.01515205 | 0.06893748 | 4        |
| 0104.27.06.SINUS | 0.01964533 | 0.00571675 | 0.02834221 | 0.05354057 | 2        |
| 0104.27.07.SINUS | 0.01097545 | 0.00263642 | 0.00791711 | 0.05137333 | 4        |
| 0104.27.08.SINUS | 0.65581038 | 0.45334025 | 0.4074779  | 0.59864025 | 5        |
| 0104.27.09.SINUS | 0.07297444 | 0.02729362 | 0.10527986 | 0.11763635 | 2        |
| 0104.27.10.SINUS | 0.0177899  | 0.00440411 | 0.0128327  | 0.08401063 | 4        |
| 0104.28.01.SINUS | 0.02275625 | 0.00551117 | 0.0116944  | 0.14182516 | 7        |
| 0104.32.01.SINUS | 0.86733327 | 0.45454917 | 0.36170607 | 0.95381009 | 11       |
| 0104.32.02.SINUS | 0.69004526 | 0.37816213 | 0.35461312 | 0.67418798 | 7        |

|                  |            |            |            |            |    |
|------------------|------------|------------|------------|------------|----|
| 0104.32.03.SINUS | 0.82344377 | 0.52160291 | 0.28489199 | 0.99783591 | 18 |
| 0104.32.04.SINUS | 0.02379887 | 0.00605704 | 0.0122302  | 0.1255229  | 7  |
| 0104.32.05.SINUS | 0.14457184 | 0.05562015 | 0.06278675 | 0.25443824 | 10 |
| 0104.32.06.SINUS | 0.15334763 | 0.06380262 | 0.07880509 | 0.21475188 | 7  |
| 0104.32.07.SINUS | 0.15684413 | 0.0605612  | 0.06811654 | 0.34175494 | 10 |
| 0104.33.01.SINUS | 0.04310884 | 0.01254171 | 0.01491464 | 0.27159448 | 18 |
| 0104.33.02.SINUS | 0.53595587 | 0.34303814 | 0.27542683 | 0.48392336 | 7  |
| 0104.33.03.SINUS | 0.03000626 | 0.00746224 | 0.01365644 | 0.18039856 | 9  |
| 0104.33.04.SINUS | 0.69416067 | 0.45336895 | 0.24500826 | 0.73161372 | 17 |
| 0104.33.05.SINUS | 0.49254924 | 0.30718119 | 0.21391142 | 0.46863302 | 10 |
| 0104.33.06.SINUS | 0.00719502 | 0.00139141 | 0.00280513 | 0.1381955  | 13 |
| 0104.33.07.SINUS | 0.1788408  | 0.05278516 | 0.045953   | 1.98165623 | 49 |
| 0104.33.08.SINUS | 0.08335648 | 0.02719195 | 0.03620126 | 0.25233094 | 10 |
| 0104.35.01.SINUS | 0.89561934 | 0.52979487 | 0.32302639 | 1.00465728 | 16 |
| 0104.35.02.SINUS | 0.85395521 | 0.52355481 | 0.26870382 | 1.25972202 | 24 |
| 0104.35.03.SINUS | 0.75738899 | 0.31301841 | 0.19782187 | 3.56206679 | 46 |
| 0104.35.04.SINUS | 1.24399943 | 0.62473957 | 0.31799389 | 3.13508178 | 50 |
| 0104.35.05.SINUS | 0.3378025  | 0.10282788 | 0.08468384 | 2.96338754 | 54 |
| 0104.35.06.SINUS | 2.63562916 | 0.83780344 | 0.62247588 | 13.0473956 | 69 |
| 0104.35.07.SINUS | 0.06032969 | 0.01531783 | 0.02427845 | 0.38003598 | 12 |
| 0104.36.01.SINUS | 0.03495463 | 0.0098714  | 0.01457721 | 0.17654247 | 11 |
| 0104.36.02.SINUS | 0.83224584 | 0.42967049 | 0.42768976 | 1.14070365 | 7  |
| 0104.41.01.SINUS | 0.10540975 | 0.04214031 | 0.07603706 | 0.15114284 | 4  |
| 0104.41.02.SINUS | 0.01533826 | 0.0039999  | 0.01106422 | 0.05744511 | 4  |
| 0104.41.03.SINUS | 0.06672001 | 0.02447487 | 0.09625663 | 0.11131475 | 2  |
| 0104.42.01.SINUS | 0.01807113 | 0.00442783 | 0.01303556 | 0.09118583 | 4  |
| 0104.43.01.SINUS | 0.02637757 | 0.00614694 | 0.00866394 | 0.3089862  | 21 |
| 0104.43.02.SINUS | 0.59837818 | 0.37762027 | 0.21581931 | 0.67459121 | 16 |
| 0104.43.03.SINUS | 0.36706226 | 0.20307205 | 0.14771672 | 0.42625751 | 12 |
| 0104.43.04.SINUS | 0.03255379 | 0.0070786  | 0.01233538 | 0.45574127 | 14 |
| 0104.44.01.SINUS | 0.64386079 | 0.44264048 | 0.21492601 | 0.659217   | 20 |
| 0104.44.02.SINUS | 0.69408029 | 0.49392019 | 0.31588955 | 0.67550772 | 9  |
| 0104.44.03.SINUS | 0.61347552 | 0.40354821 | 0.21224796 | 0.68952096 | 18 |
| 0104.44.05.SINUS | 0.06140531 | 0.02132493 | 0.04429457 | 0.11321719 | 4  |
| 0104.45.01.SINUS | 0.0081712  | 0.00171266 | 0.00456044 | 0.08352691 | 6  |
| 0104.45.02.SINUS | 0.03262632 | 0.01001701 | 0.02027187 | 0.08118358 | 5  |
| 0104.45.05.SINUS | 0.01537737 | 0.00400778 | 0.01399708 | 0.05487295 | 3  |
| 0104.46.01.SINUS | 0.10567839 | 0.03882913 | 0.03902379 | 0.34435305 | 15 |
| 0104.47.01.SINUS | 0.09856943 | 0.03622011 | 0.04280816 | 0.2160261  | 10 |
| 0104.47.02.SINUS | 0.66867394 | 0.43215508 | 0.37319403 | 0.58890149 | 6  |
| 0104.48.01.SINUS | 2.35363069 | 0.86435954 | 0.63379157 | 5.61677333 | 41 |
| 0104.50.01.SINUS | 0.69408007 | 0.49985878 | 0.6317789  | 0.69914799 | 3  |
| 0104.50.02.SINUS | 0.37886231 | 0.21033836 | 0.19469672 | 0.37760126 | 7  |
| 0104.50.03.SINUS | 0.68887166 | 0.48359093 | 0.38446659 | 0.64854983 | 6  |
| 0104.51.01.SINUS | 0.34527223 | 0.18211599 | 0.13461171 | 0.46116123 | 13 |
| 0104.52.01.SINUS | 1.12138729 | 0.54057118 | 0.40445497 | 1.41079921 | 16 |
| 0104.52.02.SINUS | 0.00520951 | 0.00105428 | 0.00290748 | 0.05420299 | 6  |
| 0104.52.03.SINUS | 0.44870722 | 0.19058439 | 0.19487107 | 0.69406454 | 10 |
| 0104.52.05.SINUS | 1.2623419  | 0.60501169 | 0.39720595 | 1.70145422 | 24 |
| 0104.52.06.SINUS | 1.29989416 | 0.70018226 | 0.66801345 | 1.43817256 | 7  |
| 0104.52.07.SINUS | 0.27742563 | 0.12400344 | 0.20012029 | 0.33000668 | 4  |
| 0104.53.01.SINUS | 0.5450781  | 0.34868089 | 0.28011473 | 0.49035187 | 7  |
| 0104.55.01.SINUS | 0.24599724 | 0.11865297 | 0.1774495  | 0.26771423 | 4  |

**Supplemental table 2. Top 100 taxa identified in this study.** The mean abundance per participant is averaged across all study participants, regardless of whether the taxon was detected. For participants with multiple study visits, the relative abundance of each taxon was first averaged across their visits. Number of participants is a count of the number of study participants with at least one study visit in which that taxon was identified. The prevalence is the percentage of patients with at least one study visit in which that taxon was identified. The Rs95 value is an estimate of mean abundance that takes into account the uneven sequencing depth of samples and is presented as a count of participants and prevalence based on this adjustment. All statistics for taxonomic abundances are performed on additive log-transformed abundances.

| Rank | Taxa                      | Mean abundance per participant | Number of participants | Prevalence (%) | Number of participants (Rs95) | Prevalence (Rs95;%) | Mean abundance across all samples | Standard Deviation | Standard Error |
|------|---------------------------|--------------------------------|------------------------|----------------|-------------------------------|---------------------|-----------------------------------|--------------------|----------------|
| 1    | Staphylococcus            | 0.4118                         | 25                     | 92.6           | 23                            | 85.2                | 0.43002067                        | 0.424574076        | 0.0422467      |
| 2    | Pseudomonadaceae_uncl     | 0.4077                         | 25                     | 92.6           | 21                            | 77.8                | 0.348833988                       | 0.41211472         | 0.041006947    |
| 3    | Bordetella                | 0.043                          | 15                     | 55.6           | 10                            | 37                  | 0.069704213                       | 0.230869672        | 0.022972391    |
| 4    | Burkholderia              | 0.0275                         | 8                      | 29.6           | 4                             | 14.8                | 0.038078581                       | 0.163958354        | 0.016314466    |
| 5    | Streptococcus             | 0.0146                         | 19                     | 70.4           | 13                            | 48.1                | 0.01817556                        | 0.107603503        | 0.010706949    |
| 6    | Fusobacterium             | 0.01                           | 6                      | 22.2           | 2                             | 7.4                 | 0.002678309                       | 0.022560873        | 0.002244891    |
| 7    | Stenotrophomonas          | 0.0098                         | 12                     | 44.4           | 6                             | 22.2                | 0.020840547                       | 0.10566466         | 0.010514027    |
| 8    | Actinobacteria_uncl       | 0.0093                         | 13                     | 48.1           | 8                             | 29.6                | 0.020388974                       | 0.116331921        | 0.011575459    |
| 9    | Pasteurellaceae_uncl      | 0.0085                         | 10                     | 37             | 6                             | 22.2                | 0.0023738915                      | 0.022733269        | 0.002262045    |
| 10   | Bacteroides               | 0.0084                         | 11                     | 40.7           | 7                             | 25.9                | 0.002373978                       | 0.022598338        | 0.002248619    |
| 11   | Mycobacterium             | 0.0069                         | 3                      | 11.1           | 2                             | 7.4                 | 0.006255698                       | 0.053828728        | 0.005356159    |
| 12   | Neisseria                 | 0.0066                         | 10                     | 37             | 6                             | 22.2                | 0.001873116                       | 0.017635309        | 0.001754779    |
| 13   | Prevotella_7              | 0.0062                         | 6                      | 22.2           | 4                             | 14.8                | 0.00180565                        | 0.016410278        | 0.001632884    |
| 14   | Prevotella                | 0.0055                         | 9                      | 33.3           | 6                             | 22.2                | 0.003978868                       | 0.022749065        | 0.002263617    |
| 15   | Haemophilus               | 0.0035                         | 6                      | 22.2           | 4                             | 14.8                | 0.002634651                       | 0.019099189        | 0.00190044     |
| 16   | Enterobacteriaceae_uncl   | 0.0035                         | 11                     | 40.7           | 4                             | 14.8                | 0.003576617                       | 0.018490395        | 0.001839863    |
| 17   | Corynebacterium_1         | 0.0033                         | 15                     | 55.6           | 9                             | 33.3                | 0.007405359                       | 0.053400466        | 0.005313545    |
| 18   | Dolosigranulum            | 0.0024                         | 4                      | 14.8           | 2                             | 7.4                 | 0.004828915                       | 0.048269142        | 0.004802959    |
| 19   | Veillonella               | 0.0022                         | 9                      | 33.3           | 4                             | 14.8                | 0.000647501                       | 0.005971301        | 0.000594167    |
| 20   | Leptotrichia              | 0.0017                         | 5                      | 18.5           | 2                             | 7.4                 | 0.000453501                       | 0.00464456         | 0.00044423     |
| 21   | Alloprevotella            | 0.0008                         | 2                      | 7.4            | 1                             | 3.7                 | 0.000202502                       | 0.002025486        | 0.000201543    |
| 22   | Gemella                   | 0.0007                         | 4                      | 14.8           | 3                             | 11.1                | 0.000202893                       | 0.001922157        | 0.000191262    |
| 23   | Lachnoanaerobaculum       | 0.0005                         | 3                      | 11.1           | 1                             | 3.7                 | 0.000147851                       | 0.001463586        | 0.000145632    |
| 24   | Peptoniphilus             | 0.0005                         | 3                      | 11.1           | 2                             | 7.4                 | 0.001928542                       | 0.014726115        | 0.001465303    |
| 25   | Selenomonas_3             | 0.0003                         | 2                      | 7.4            | 1                             | 3.7                 | 8.75489E-05                       | 0.000857603        | 8.53347E-05    |
| 26   | Capnocytophaga            | 0.0003                         | 7                      | 25.9           | 1                             | 3.7                 | 0.000212675                       | 0.001449359        | 0.000144217    |
| 27   | Prevotella_6              | 0.0003                         | 4                      | 14.8           | 2                             | 7.4                 | 0.00010341                        | 0.000813092        | 8.09056E-05    |
| 28   | Campylobacter             | 0.0003                         | 4                      | 14.8           | 3                             | 11.1                | 0.000331682                       | 0.001969071        | 0.00019593     |
| 29   | Stomatobaculum            | 0.0003                         | 3                      | 11.1           | 1                             | 3.7                 | 7.58472E-05                       | 0.000724581        | 7.20985E-05    |
| 30   | Anaerococcus              | 0.0003                         | 7                      | 25.9           | 3                             | 11.1                | 0.000557374                       | 0.003150702        | 0.000313507    |
| 31   | Prevotellaceae_uncl       | 0.0002                         | 8                      | 29.6           | 2                             | 7.4                 | 0.000517544                       | 0.004888722        | 0.000486446    |
| 32   | Pseudomonas               | 0.0002                         | 12                     | 44.4           | 5                             | 18.5                | 0.002669558                       | 0.02513086         | 0.002500614    |
| 33   | Acinetobacter             | 0.0002                         | 15                     | 55.6           | 7                             | 25.9                | 0.0004655                         | 0.002066011        | 0.000205576    |
| 34   | Moraxella                 | 0.0002                         | 10                     | 37             | 6                             | 22.2                | 0.000133847                       | 0.000572013        | 5.69174E-05    |
| 35   | Megasphaera               | 0.0002                         | 4                      | 14.8           | 1                             | 3.7                 | 4.51189E-05                       | 0.000428852        | 4.26723E-05    |
| 36   | Granulicatella            | 0.0001                         | 6                      | 22.2           | 1                             | 3.7                 | 0.000164862                       | 0.001226152        | 0.000122007    |
| 37   | Gammaproteobacteria_uncl  | 0.0001                         | 8                      | 29.6           | 4                             | 14.8                | 7.13E-05                          | 0.000275222        | 2.74E-05       |
| 38   | Bergeyella                | 0.0001                         | 3                      | 11.1           | 1                             | 3.7                 | 2.43348E-05                       | 0.000208357        | 2.07323E-05    |
| 39   | Blautia                   | 0.0001                         | 8                      | 29.6           | 3                             | 11.1                | 0.000678114                       | 0.00655322         | 0.00065207     |
| 40   | Chryseobacterium          | 0.0001                         | 6                      | 22.2           | 4                             | 14.8                | 8.801E-05                         | 0.000541202        | 5.38517E-05    |
| 41   | Sphingomonas              | 0.0001                         | 11                     | 40.7           | 7                             | 25.9                | 5.25892E-05                       | 0.00019488         | 1.93912E-05    |
| 42   | Pelomonas                 | 0.0001                         | 10                     | 37             | 5                             | 18.5                | 0.000100349                       | 0.000468823        | 4.66497E-05    |
| 43   | Turicella                 | 0.0001                         | 6                      | 22.2           | 2                             | 7.4                 | 0.000159799                       | 0.001021605        | 0.000101654    |
| 44   | Oribacterium              | 0.0001                         | 2                      | 7.4            | 2                             | 7.4                 | 1.91712E-05                       | 0.000151526        | 1.50774E-05    |
| 45   | Neisseriaceae_uncl        | 0.0001                         | 5                      | 18.5           | 2                             | 7.4                 | 4.27E-05                          | 0.000268764        | 2.67E-05       |
| 46   | Ruminococcus_2            | 0.0001                         | 4                      | 14.8           | 2                             | 7.4                 | 0.000556224                       | 0.00546117         | 0.000543407    |
| 47   | Lactobacillus             | 0.0001                         | 7                      | 25.9           | 4                             | 14.8                | 5.14529E-05                       | 0.000259294        | 2.58007E-05    |
| 48   | Finegoldia                | 0.0001                         | 5                      | 18.5           | 2                             | 7.4                 | 0.000151581                       | 0.000924509        | 9.19921E-05    |
| 49   | Rothia                    | 0                              | 9                      | 33.3           | 5                             | 18.5                | 4.07843E-05                       | 0.000131184        | 1.30533E-05    |
| 50   | Aquabacterium             | 0                              | 4                      | 14.8           | 3                             | 11.1                | 2.00704E-05                       | 0.000150486        | 1.49739E-05    |
| 51   | Bradyrhizobium            | 0                              | 10                     | 37             | 6                             | 22.2                | 6.77824E-05                       | 0.000255806        | 2.54537E-05    |
| 52   | Micrococcus               | 0                              | 8                      | 29.6           | 2                             | 7.4                 | 5.24264E-05                       | 0.000239931        | 2.3874E-05     |
| 53   | [Eubacterium]_nodatum_grp | 0                              | 1                      | 3.7            | 1                             | 3.7                 | 1.03E-05                          | 0.000103496        | 1.03E-05       |
| 54   | Bacilli_uncl              | 0                              | 9                      | 33.3           | 5                             | 18.5                | 4.71E-05                          | 0.000145319        | 1.45E-05       |
| 55   | Comamonadaceae_uncl       | 0                              | 5                      | 18.5           | 4                             | 14.8                | 7.56E-05                          | 0.000504326        | 5.02E-05       |
| 56   | Bacteria_uncl             | 0                              | 8                      | 29.6           | 4                             | 14.8                | 4.18E-05                          | 0.000146741        | 1.46E-05       |
| 57   | Methylobacterium          | 0                              | 9                      | 33.3           | 6                             | 22.2                | 4.05889E-05                       | 0.000168225        | 1.6739E-05     |
| 58   | Lachnospiraceae_uncl      | 0                              | 7                      | 25.9           | 2                             | 7.4                 | 0.000196502                       | 0.00188629         | 0.000187693    |
| 59   | Dialister                 | 0                              | 2                      | 7.4            | 2                             | 7.4                 | 8.78323E-05                       | 0.000525151        | 5.22544E-05    |
| 60   | Alishewanella             | 0                              | 4                      | 14.8           | 1                             | 3.7                 | 1.1186E-05                        | 8.23999E-05        | 8.1991E-06     |
| 61   | Actinomyces               | 0                              | 3                      | 11.1           | 1                             | 3.7                 | 1.017E-05                         | 6.53118E-05        | 6.49877E-06    |
| 62   | unknown_uncl              | 0                              | 3                      | 11.1           | 1                             | 3.7                 | 3.06E-05                          | 0.000176293        | 1.75E-05       |
| 63   | Subdoligranulum           | 0                              | 5                      | 18.5           | 1                             | 3.7                 | 0.000167339                       | 0.001415227        | 0.00014082     |
| 64   | Porphyromonas             | 0                              | 5                      | 18.5           | 2                             | 7.4                 | 2.41443E-05                       | 0.000159913        | 1.5912E-05     |
| 65   | Hymenobacter              | 0                              | 5                      | 18.5           | 3                             | 11.1                | 2.10241E-05                       | 0.000105945        | 1.05419E-05    |



|     |                             |   |   |      |   |      |             |             |             |
|-----|-----------------------------|---|---|------|---|------|-------------|-------------|-------------|
| 66  | Alloiococcus                | 0 | 6 | 22.2 | 3 | 11.1 | 2.14639E-05 | 0.00012783  | 1.27196E-05 |
| 67  | Domibacillus                | 0 | 1 | 3.7  | 1 | 3.7  | 3.03339E-05 | 0.000304852 | 3.03339E-05 |
| 68  | Delftia                     | 0 | 6 | 22.2 | 1 | 3.7  | 1.54631E-05 | 7.56312E-05 | 7.52559E-06 |
| 69  | Ruminococcaceae_UCG_002     | 0 | 5 | 18.5 | 2 | 7.4  | 8.17E-05    | 0.000513844 | 5.11E-05    |
| 70  | Prevotella_9                | 0 | 7 | 25.9 | 2 | 7.4  | 7.46306E-05 | 0.000568666 | 5.65844E-05 |
| 71  | Prevotella_2                | 0 | 4 | 14.8 | 0 | 0    | 9.40291E-06 | 6.42449E-05 | 6.3926E-06  |
| 72  | Janibacter                  | 0 | 2 | 7.4  | 2 | 7.4  | 9.20962E-06 | 5.64448E-05 | 5.61646E-06 |
| 73  | Alcaligenaceae_uncl         | 0 | 3 | 11.1 | 3 | 11.1 | 2.89E-05    | 0.000109037 | 1.08E-05    |
| 74  | Pseudobutyrvibrio           | 0 | 6 | 22.2 | 3 | 11.1 | 0.000103679 | 0.000894836 | 8.90395E-05 |
| 75  | Faecalibacterium            | 0 | 6 | 22.2 | 2 | 7.4  | 5.55362E-05 | 0.000342782 | 3.41081E-05 |
| 76  | Sporobacter                 | 0 | 1 | 3.7  | 1 | 3.7  | 5.71651E-06 | 5.74502E-05 | 5.71651E-06 |
| 77  | Azomonas                    | 0 | 7 | 25.9 | 2 | 7.4  | 1.67769E-05 | 5.25508E-05 | 5.229E-06   |
| 78  | Anaerostipes                | 0 | 3 | 11.1 | 2 | 7.4  | 0.000132057 | 0.000128451 | 0.000128451 |
| 79  | Micrococcaceae_uncl         | 0 | 6 | 22.2 | 1 | 3.7  | 1.69E-05    | 8.91E-05    | 8.87E-06    |
| 80  | Fusicatenibacter            | 0 | 1 | 3.7  | 1 | 3.7  | 0.000138337 | 0.001390272 | 0.000138337 |
| 81  | Sorangium                   | 0 | 4 | 14.8 | 1 | 3.7  | 2.22701E-05 | 0.000139415 | 1.38723E-05 |
| 82  | Bacillales_uncl             | 0 | 9 | 33.3 | 1 | 3.7  | 1.78E-05    | 8.07E-05    | 8.03E-06    |
| 83  | Xanthomonadaceae_uncl       | 0 | 4 | 14.8 | 1 | 3.7  | 7.95E-06    | 4.95E-05    | 4.93E-06    |
| 84  | Staphylococcaceae_uncl      | 0 | 7 | 25.9 | 1 | 3.7  | 1.39E-05    | 5.18E-05    | 5.15E-06    |
| 85  | Massilia                    | 0 | 3 | 11.1 | 1 | 3.7  | 1.43407E-05 | 7.2316E-05  | 7.19571E-06 |
| 86  | Abiotrophia                 | 0 | 5 | 18.5 | 1 | 3.7  | 9.92484E-06 | 3.74956E-05 | 3.73095E-06 |
| 87  | Cloacibacterium             | 0 | 4 | 14.8 | 3 | 11.1 | 1.59258E-05 | 9.49309E-05 | 9.44598E-06 |
| 88  | Ruminococcus_1              | 0 | 1 | 3.7  | 1 | 3.7  | 9.22517E-05 | 0.000894035 | 8.89598E-05 |
| 89  | Actinobacillus              | 0 | 1 | 3.7  | 0 | 0    | 2.94234E-06 | 2.95702E-05 | 2.94234E-06 |
| 90  | Facklamia                   | 0 | 2 | 7.4  | 1 | 3.7  | 5.64365E-06 | 4.08389E-05 | 4.06363E-06 |
| 91  | Devosia                     | 0 | 2 | 7.4  | 1 | 3.7  | 5.64365E-06 | 4.08389E-05 | 4.06363E-06 |
| 92  | Brevundimonas               | 0 | 3 | 11.1 | 1 | 3.7  | 1.62809E-05 | 0.00011187  | 1.11315E-05 |
| 93  | Ruminococcaceae_uncl        | 0 | 2 | 7.4  | 1 | 3.7  | 2.00E-05    | 0.000140293 | 1.40E-05    |
| 94  | Alphaproteobacteria_uncl    | 0 | 6 | 22.2 | 2 | 7.4  | 1.72E-05    | 9.01E-05    | 8.97E-06    |
| 95  | Tepidiphilus                | 0 | 2 | 7.4  | 1 | 3.7  | 1.95942E-05 | 0.000186642 | 1.85716E-05 |
| 96  | Conchiformibius             | 0 | 1 | 3.7  | 1 | 3.7  | 4.57391E-06 | 4.59672E-05 | 4.57391E-06 |
| 97  | Candidate_division_SR1_uncl | 0 | 2 | 7.4  | 0 | 0    | 3.12E-06    | 2.21E-05    | 2.20E-06    |
| 98  | Sphingomonadales_uncl       | 0 | 6 | 22.2 | 0 | 0    | 3.76E-05    | 0.000236781 | 2.36E-05    |
| 99  | Lachnospirillum             | 0 | 8 | 29.6 | 3 | 11.1 | 3.29414E-05 | 0.00020429  | 2.03276E-05 |
| 100 | Rheinheimera                | 0 | 3 | 11.1 | 0 | 0    | 7.04733E-06 | 4.60856E-05 | 4.58569E-06 |

**Supplemental table 3. CF CRS microbial communities are highly individualized, but may share similarities during sinus exacerbation.** PERMANOVA results describing the proportion of variance in sample composition attributable to variables tested ("source" of variation). One source contributed a significant amount of variance ( $p < 0.05$ ; Patient ID). Whether or not a study participant was experiencing a sinus exacerbation had a non-statistically significant effect ( $p < 0.1$ ). The remaining variables had non-significant effects ( $p > 0.1$ ). The name of the variable as it appears in the metadata sheet is included in parentheses in the first column ("Source"). The model was run with 12000 permutations, using adonis2 with `by = "margin"`. Significance levels were determined by the  $\text{Pr}( > F)$ . \*\*\*:  $p < 0.001$ , \*\*:  $p < 0.01$ , \*:  $p < 0.05$ , °:  $p < 0.1$ , blank:  $p > 0.1$ .

| Source                                                  | df | Sum of Squares (SS) | Mean Squares (MS) | F       | R2      | Pr(>F)    | Significance |
|---------------------------------------------------------|----|---------------------|-------------------|---------|---------|-----------|--------------|
| Patient ID (crs_ID)                                     | 26 | 54.159              | 2.08304           | 3.04244 | 0.51012 | 9.999e-05 | ***          |
| Current topical antibiotic usage (current_topabx)       | 1  | 0.964               | 0.96358           | 1.40739 | 0.00908 | 0.22008   |              |
| Current sinus exacerbation (sinus_exacerbation)         | 1  | 1.724               | 1.72434           | 2.51854 | 0.01624 | 0.06599   | °            |
| Current pulmonary exacerbation (pulmonary_exacerbation) | 1  | 0.163               | 0.16264           | 0.23754 | 0.00153 | 0.91471   |              |
| Residuals                                               | 67 | 45.872              | 0.68466           |         | 0.43207 |           |              |
| Total                                                   | 96 | 106.169             | 1.10593           |         | 1       |           |              |

Supplemental table 4. Metadata associated with each sequenced microbiota sample. See the codebook in Supplemental table 5 for a description of each variable.

| SampleID         | BarcodeSequence | LinkerPrimerSequence   | participant_id | visit_number | days_since_first_visit | sex | is_female | age_onenrollment | BMI_on_enrollment | cfu | transplant_prior_to_enrollment | hmzg_mut508 | allergic_rhinitis | ever_on_topabx | ever_on_topvanco | ever_on_topgent |
|------------------|-----------------|------------------------|----------------|--------------|------------------------|-----|-----------|------------------|-------------------|-----|--------------------------------|-------------|-------------------|----------------|------------------|-----------------|
| 0104.01.01.SINUS | CGTTTGGAAATGA   | GTGTGYCAGCMGCCCGCGGTAA | crs_01         | 1            | 0                      |     | 0         | 23.94000053      | 24.90999985       | 0   | 0                              | 0.5         | 0                 | 1              | 1                | 1               |
| 0104.01.02.SINUS | AAGAACCTCATGA   | GTGTGYCAGCMGCCCGCGGTAA | crs_01         | 2            | 77                     |     | 0         | 23.94000053      | 24.90999985       | 0   | 0                              | 0.5         | 0                 | 1              | 1                | 1               |
| 0104.01.03.SINUS | TGATATCGTCTT    | GTGTGYCAGCMGCCCGCGGTAA | crs_01         | 3            | 161                    |     | 0         | 23.94000053      | 24.90999985       | 0   | 0                              | 0.5         | 0                 | 1              | 1                | 1               |
| 0104.01.04.SINUS | CGGTAGCCTACT    | GTGTGYCAGCMGCCCGCGGTAA | crs_01         | 4            | 245                    |     | 0         | 23.94000053      | 24.90999985       | 0   | 0                              | 0.5         | 0                 | 1              | 1                | 1               |
| 0104.04.01.SINUS | AATTTAGGTAGG    | GTGTGYCAGCMGCCCGCGGTAA | crs_04         | 1            | 0                      |     | 0         | 27.02000046      | 20.89999962       | 1   | 1                              | 1           | 1                 | 1              | 0                | 0               |
| 0104.07.08.SINUS | TTGATGGCCGCA    | GTGTGYCAGCMGCCCGCGGTAA | crs_07         | 1            | 0                      |     | 1         | 43.56999969      | 24.84000015       | 1   | 0                              | 1           | 1                 | 1              | 1                | 1               |
| 0104.07.01.SINUS | AGAGGGGTGATG    | GTGTGYCAGCMGCCCGCGGTAA | crs_07         | 2            | 98                     |     | 1         | 43.56999969      | 24.84000015       | 1   | 0                              | 1           | 1                 | 1              | 1                | 1               |
| 0104.07.02.SINUS | AGCTCTAGAAAC    | GTGTGYCAGCMGCCCGCGGTAA | crs_07         | 3            | 147                    |     | 1         | 43.56999969      | 24.84000015       | 1   | 0                              | 1           | 1                 | 1              | 1                | 1               |
| 0104.07.03.SINUS | CTGACACGAATA    | GTGTGYCAGCMGCCCGCGGTAA | crs_07         | 4            | 210                    |     | 1         | 43.56999969      | 24.84000015       | 1   | 0                              | 1           | 1                 | 1              | 1                | 1               |
| 0104.07.04.SINUS | GCTGCCACCTA     | GTGTGYCAGCMGCCCGCGGTAA | crs_07         | 5            | 490                    |     | 1         | 43.56999969      | 24.84000015       | 1   | 0                              | 1           | 1                 | 1              | 1                | 1               |
| 0104.07.05.SINUS | GCGTTTGTAGC     | GTGTGYCAGCMGCCCGCGGTAA | crs_07         | 6            | 595                    |     | 1         | 43.56999969      | 24.84000015       | 1   | 0                              | 1           | 1                 | 1              | 1                | 1               |
| 0104.07.06.SINUS | AGATCGTGCCCTA   | GTGTGYCAGCMGCCCGCGGTAA | crs_07         | 7            | 686                    |     | 1         | 43.56999969      | 24.84000015       | 1   | 0                              | 1           | 1                 | 1              | 1                | 1               |
| 0104.07.07.SINUS | AGATCGTGCCCTA   | GTGTGYCAGCMGCCCGCGGTAA | crs_07         | 8            | 756                    |     | 1         | 43.56999969      | 24.84000015       | 1   | 0                              | 1           | 1                 | 1              | 1                | 1               |
| 0104.08.01.SINUS | AATGGTTCAGCA    | GTGTGYCAGCMGCCCGCGGTAA | crs_08         | 1            | 0                      |     | 0         | 24.20999908      | 19.52000046       | 0   | 0                              | 0.5         | 0                 | 1              | 1                | 1               |
| 0104.09.08.SINUS | GAACAGTACTC     | GTGTGYCAGCMGCCCGCGGTAA | crs_09         | 1            | 0                      |     | 1         | 25.79000092      | 28.76000023       | 1   | NA                             | 0.5         | 0                 | 1              | 0                | 0               |
| 0104.09.01.SINUS | CGCACCCATACA    | GTGTGYCAGCMGCCCGCGGTAA | crs_09         | 2            | 182                    |     | 1         | 25.79000092      | 28.76000023       | 1   | NA                             | 0.5         | 0                 | 1              | 0                | 0               |
| 0104.09.02.SINUS | GTGCCATAATCG    | GTGTGYCAGCMGCCCGCGGTAA | crs_09         | 3            | 336                    |     | 1         | 25.79000092      | 28.76000023       | 1   | NA                             | 0.5         | 0                 | 1              | 0                | 0               |
| 0104.09.03.SINUS | CTACAGGGTCTC    | GTGTGYCAGCMGCCCGCGGTAA | crs_09         | 4            | 587                    |     | 1         | 25.79000092      | 28.76000023       | 1   | NA                             | 0.5         | 0                 | 1              | 0                | 0               |
| 0104.09.04.SINUS | CTACAGGGTCTC    | GTGTGYCAGCMGCCCGCGGTAA | crs_09         | 5            | 679                    |     | 1         | 25.79000092      | 28.76000023       | 1   | NA                             | 0.5         | 0                 | 1              | 0                | 0               |
| 0104.09.05.SINUS | CTTGGAGGCTTA    | GTGTGYCAGCMGCCCGCGGTAA | crs_09         | 6            | 770                    |     | 1         | 25.79000092      | 28.76000023       | 1   | NA                             | 0.5         | 0                 | 1              | 0                | 0               |
| 0104.18.03.SINUS | CACGTTTATTC     | GTGTGYCAGCMGCCCGCGGTAA | crs_18         | 1            | 0                      |     | 1         | 27.68000031      | 19.87999916       | 1   | 0                              | 1           | 0                 | 1              | 0                | 0               |
| 0104.18.01.SINUS | TAATCGGTGCA     | GTGTGYCAGCMGCCCGCGGTAA | crs_18         | 2            | 185                    |     | 1         | 27.68000031      | 19.87999916       | 1   | 0                              | 1           | 0                 | 1              | 0                | 0               |
| 0104.18.02.SINUS | CGGACACCCGA     | GTGTGYCAGCMGCCCGCGGTAA | crs_18         | 3            | 639                    |     | 1         | 27.68000031      | 19.87999916       | 1   | 0                              | 1           | 0                 | 1              | 0                | 0               |
| 0104.20.01.SINUS | GAAGAGGGTGA     | GTGTGYCAGCMGCCCGCGGTAA | crs_20         | 1            | 0                      |     | 0         | 23.06999969      | 19.54000092       | 0   | 0                              | 0.5         | 0                 | 1              | 0                | 0               |
| 0104.20.04.SINUS | TTACACAAAGGC    | GTGTGYCAGCMGCCCGCGGTAA | crs_20         | 2            | 385                    |     | 1         | 23.06999969      | 19.54000092       | 0   | 0                              | 1           | 0                 | 1              | 0                | 0               |
| 0104.24.01.SINUS | GTTAACTTACTA    | GTGTGYCAGCMGCCCGCGGTAA | crs_24         | 1            | 0                      |     | 1         | 27.62000084      | 24.13999939       | 1   | 0                              | 1           | 1                 | 1              | 1                | 1               |
| 0104.24.02.SINUS | GTTAACTTACTA    | GTGTGYCAGCMGCCCGCGGTAA | crs_24         | 2            | 15                     |     | 1         | 27.62000084      | 24.13999939       | 1   | 0                              | 1           | 1                 | 1              | 1                | 1               |
| 0104.24.03.SINUS | CGTATAAATGCG    | GTGTGYCAGCMGCCCGCGGTAA | crs_24         | 3            | 106                    |     | 1         | 27.62000084      | 24.13999939       | 1   | 0                              | 1           | 1                 | 1              | 1                | 1               |
| 0104.24.04.SINUS | ATGCTGCAACAC    | GTGTGYCAGCMGCCCGCGGTAA | crs_24         | 4            | 154                    |     | 1         | 27.62000084      | 24.13999939       | 1   | 0                              | 1           | 1                 | 1              | 1                | 1               |
| 0104.24.05.SINUS | ACTCGCTCGCTG    | GTGTGYCAGCMGCCCGCGGTAA | crs_24         | 5            | 281                    |     | 1         | 27.62000084      | 24.13999939       | 1   | 0                              | 1           | 1                 | 1              | 1                | 1               |
| 0104.24.07.SINUS | CGTCCGTATGAA    | GTGTGYCAGCMGCCCGCGGTAA | crs_24         | 6            | 393                    |     | 1         | 27.62000084      | 24.13999939       | 1   | 0                              | 1           | 1                 | 1              | 1                | 1               |
| 0104.24.10.SINUS | ACGTGAGGAAGC    | GTGTGYCAGCMGCCCGCGGTAA | crs_24         | 7            | 486                    |     | 1         | 27.62000084      | 24.13999939       | 1   | 0                              | 1           | 1                 | 1              | 1                | 1               |
| 0104.24.08.SINUS | GTTTGTCTGGGA    | GTGTGYCAGCMGCCCGCGGTAA | crs_24         | 8            | 491                    |     | 1         | 27.62000084      | 24.13999939       | 1   | 0                              | 1           | 1                 | 1              | 1                | 1               |
| 0104.24.09.SINUS | GTTTGTCTGGGA    | GTGTGYCAGCMGCCCGCGGTAA | crs_24         | 9            | 512                    |     | 1         | 27.62000084      | 24.13999939       | 1   | 0                              | 1           | 1                 | 1              | 1                | 1               |
| 0104.24.12.SINUS | CATATAGCCGA     | GTGTGYCAGCMGCCCGCGGTAA | crs_24         | 10           | 596                    |     | 1         | 27.62000084      | 24.13999939       | 1   | 0                              | 1           | 1                 | 1              | 1                | 1               |
| 0104.27.01.SINUS | ACGCTTAAACGAC   | GTGTGYCAGCMGCCCGCGGTAA | crs_27         | 1            | 0                      |     | 1         | 23.45000076      | 19.15999985       | 1   | 0                              | 0.5         | 0                 | 1              | 0                | 1               |
| 0104.27.02.SINUS | TACGGATTATGG    | GTGTGYCAGCMGCCCGCGGTAA | crs_27         | 2            | 49                     |     | 1         | 23.45000076      | 19.15999985       | 1   | 0                              | 0.5         | 0                 | 1              | 0                | 1               |
| 0104.27.03.SINUS | ATACATGCAAGA    | GTGTGYCAGCMGCCCGCGGTAA | crs_27         | 3            | 112                    |     | 1         | 23.45000076      | 19.15999985       | 1   | 0                              | 0.5         | 0                 | 1              | 0                | 1               |
| 0104.27.04.SINUS | CTTAGTGCAAG     | GTGTGYCAGCMGCCCGCGGTAA | crs_27         | 4            | 259                    |     | 1         | 23.45000076      | 19.15999985       | 1   | 0                              | 0.5         | 0                 | 1              | 0                | 1               |
| 0104.27.05.SINUS | AATCTTGCGCCG    | GTGTGYCAGCMGCCCGCGGTAA | crs_27         | 5            | 364                    |     | 1         | 23.45000076      | 19.15999985       | 1   | 0                              | 0.5         | 0                 | 1              | 0                | 1               |
| 0104.27.06.SINUS | AGGATCAGGGAA    | GTGTGYCAGCMGCCCGCGGTAA | crs_27         | 6            | 462                    |     | 1         | 23.45000076      | 19.15999985       | 1   | 0                              | 0.5         | 0                 | 1              | 0                | 1               |
| 0104.27.07.SINUS | AATAACTAGSGT    | GTGTGYCAGCMGCCCGCGGTAA | crs_27         | 7            | 511                    |     | 1         | 23.45000076      | 19.15999985       | 1   | 0                              | 0.5         | 0                 | 1              | 0                | 1               |
| 0104.27.08.SINUS | AATAACTAGSGT    | GTGTGYCAGCMGCCCGCGGTAA | crs_27         | 8            | 567                    |     | 1         | 23.45000076      | 19.15999985       | 1   | 0                              | 0.5         | 0                 | 1              | 0                | 1               |
| 0104.27.09.SINUS | TATTGCGACAG     | GTGTGYCAGCMGCCCGCGGTAA | crs_27         | 9            | 588                    |     | 1         | 23.45000076      | 19.15999985       | 1   | 0                              | 0.5         | 0                 | 1              | 0                | 1               |
| 0104.27.10.SINUS | TGATGTGCTAAG    | GTGTGYCAGCMGCCCGCGGTAA | crs_27         | 10           | 651                    |     | 1         | 23.45000076      | 19.15999985       | 1   | 0                              | 0.5         | 0                 | 1              | 0                | 1               |
| 0104.28.01.SINUS | CTTATTAACGCT    | GTGTGYCAGCMGCCCGCGGTAA | crs_28         | 1            | 0                      |     | 0         | 28.36000061      | 20.34000015       | 0   | 0                              | 0           | 1                 | 1              | 0                | 0               |
| 0104.32.01.SINUS | TATTTGATTGGT    | GTGTGYCAGCMGCCCGCGGTAA | crs_32         | 1            | 0                      |     | 0         | 26.54000092      | 18.45000076       | 1   | 0                              | 0.5         | 1                 | 1              | 0                | 0               |
| 0104.32.02.SINUS | TGCAAAAGTAC     | GTGTGYCAGCMGCCCGCGGTAA | crs_32         | 2            | 70                     |     | 0         | 26.54000092      | 18.45000076       | 1   | 0                              | 0.5         | 1                 | 1              | 0                | 0               |
| 0104.32.03.SINUS | CTATGTATTAGT    | GTGTGYCAGCMGCCCGCGGTAA | crs_32         | 3            | 154                    |     | 0         | 26.54000092      | 18.45000076       | 1   | 0                              | 0.5         | 1                 | 1              | 0                | 0               |
| 0104.32.04.SINUS | CTATGTATTAGT    | GTGTGYCAGCMGCCCGCGGTAA | crs_32         | 4            | 225                    |     | 0         | 26.54000092      | 18.45000076       | 1   | 0                              | 0.5         | 1                 | 1              | 0                | 0               |
| 0104.32.05.SINUS | ACTCCCGTGTGA    | GTGTGYCAGCMGCCCGCGGTAA | crs_32         | 5            | 343                    |     | 0         | 26.54000092      | 18.45000076       | 1   | 0                              | 0.5         | 1                 | 1              | 0                | 0               |
| 0104.32.06.SINUS | CGGTATAGCAAT    | GTGTGYCAGCMGCCCGCGGTAA | crs_32         | 6            | 455                    |     | 0         | 26.54000092      | 18.45000076       | 1   | 0                              | 0.5         | 1                 | 1              | 0                | 0               |
| 0104.32.07.SINUS | CGGTATAGCAAT    | GTGTGYCAGCMGCCCGCGGTAA | crs_32         | 7            | 581                    |     | 0         | 26.54000092      | 18.45000076       | 1   | 0                              | 0.5         | 1                 | 1              | 0                | 0               |
| 0104.33.01.SINUS | ACTTGTGCTAAG    | GTGTGYCAGCMGCCCGCGGTAA | crs_33         | 1            | 0                      |     | 0         | 27.03000069      | 21.56999969       | 0   | 0                              | 1           | 0                 | 1              | 0                | 0               |
| 0104.33.02.SINUS | ACTTGTGCTAAG    | GTGTGYCAGCMGCCCGCGGTAA | crs_33         | 2            | 63                     |     | 1         | 27.03000069      | 21.56999969       | 0   | 0                              | 1           | 0                 | 1              | 0                | 0               |
| 0104.33.03.SINUS | ATTACGTATCAT    | GTGTGYCAGCMGCCCGCGGTAA | crs_33         | 3            | 147                    |     | 1         | 27.03000069      | 21.56999969       | 0   | 0                              | 1           | 0                 | 1              | 0                | 0               |
| 0104.33.04.SINUS | ATAGGAATAACC    | GTGTGYCAGCMGCCCGCGGTAA | crs_33         | 4            | 203                    |     | 1         | 27.03000069      | 21.56999969       | 0   | 0                              | 1           | 0                 | 1              | 0                | 0               |
| 0104.33.05.SINUS | ATAGGAATAACC    | GTGTGYCAGCMGCCCGCGGTAA | crs_33         | 5            | 231                    |     | 1         | 27.03000069      | 21.56999969       | 0   | 0                              | 1           | 0                 | 1              | 0                | 0               |
| 0104.33.06.SINUS | ATAGGAATAACC    | GTGTGYCAGCMGCCCGCGGTAA | crs_33         | 6            | 273                    |     | 1         | 27.03000069      | 21.56999969       | 0   | 0                              | 1           | 0                 | 1              | 0                | 0               |
| 0104.33.07.SINUS | TGTGCACGCCAT    | GTGTGYCAGCMGCCCGCGGTAA | crs_33         | 7            | 427                    |     | 1         | 27.03000069      | 21.56999969       | 0   | 0                              | 1           | 0                 | 1              | 0                | 0               |
| 0104.33.08.SINUS | TGTGCACGCCAT    | GTGTGYCAGCMGCCCGCGGTAA | crs_33         | 8            | 504                    |     | 1         | 27.03000069      | 21.56999969       | 0   | 0                              | 1           | 0                 | 1              | 0                | 0               |
| 0104.35.06.SINUS | TATCCAAAGCGA    | GTGTGYCAGCMGCCCGCGGTAA | crs_35         | 1            | 0                      |     | 1         | 35.02999878      | 25.04999924       | 0   | 0                              | 1           | 1                 | 1              | 0                | 0               |
| 0104.35.01.SINUS | AGAGCCCAAGAGC   | GTGTGYCAGCMGCCCGCGGTAA | crs_35         | 2            | 105                    |     | 1         | 35.02999878      | 25.04999924       | 0   | 0                              | 1           | 1                 | 1              | 0                | 0               |
| 0104.35.02.SINUS | GTTGACCAAGCA    | GTGTGYCAGCMGCCCGCGGTAA | crs_35         | 3            | 203                    |     | 1         | 35.02999878      | 25.04999924       | 0   | 0                              | 1           | 1                 | 1              | 0                | 0               |
| 0104.35.03.SINUS | TTGGCGACCCTA    | GTGTGYCAGCMGCCCGCGGTAA | crs_35         | 5            | 315                    |     | 1         | 35.02999878      | 25.04999924       | 0   | 0                              | 1           | 1                 | 1              | 0                | 0               |
| 0104.35.04.SINUS | TTGGCGACCCTA    | GTGTGYCAGCMGCCCGCGGTAA | crs_35         | 6            | 406                    |     | 1         | 35.02999878      | 25.04999924       | 0   | 0                              | 1           | 1                 | 1              | 0                | 0               |
| 0104.35.05.SINUS | GTCTGCCAAATG    | GTGTGYCAGCMGCCCGCGGTAA | crs_35         | 7            | 574                    |     | 1         | 35.02999878      | 25.04999924       | 0   | 0                              | 1           | 1                 | 1              | 0                | 0               |
| 0104.35.07.SINUS | TGCAACAGTCTG    | GTGTGYCAGCMGCCCGCGGTAA | crs_35         | 8            | 665                    |     | 1         | 35.02999878      | 25.04999924       | 0   | 0                              | 1           | 1                 | 1              | 0                | 0               |
| 0104.36.01.SINUS | GCTCGGTATACC    | GTGTGYCAGCMGCCCGCGGTAA | crs_36         | 1            | 0                      |     | 0         | 23.30999947      | 26.72999954       | 0   | 0                              | 0.5         | 0                 | 1              | 0                | 0               |
| 0104.36.02.SINUS | GCTCGGTATACC    | GTGTGYCAGCMGCCCGCGGTAA | crs_36         | 2            | 91                     |     | 0         | 23.30999947      | 26.72999954       | 0   | 0                              | 0.5         | 0                 | 1              | 0                | 0               |
| 0104.41.01.SINUS | TACTAACGCGGT    | GTGTGYCAGCMGCCCGCGGTAA | crs_41         | 1            | 0                      |     | 1         | 27.56999969      | 18.35000038       | 1   | 0                              | 1           | 0                 | 1              | 0                | 0               |
| 0104.41.02.SINUS | GCGATCACACCT    | GTGTGYCAGCMGCCCGCGGTAA | crs_41         | 2            | 142                    |     | 1         | 27.56999969      | 18.35000038       | 1   | 0                              | 1           | 0                 | 1              | 0                | 0               |
| 0104.41.03.SINUS | CAAACTGACTAA    | GTGTGYCAGCMGCCCGCGGTAA | crs_41         | 3            | 364                    |     | 1         | 27.56999969      | 18.35000038       | 1   | 0                              | 1           | 0                 | 1              | 0                | 0               |
| 0104.42.01.SINUS | GTCATGCTCCAA    | GTGTGYCAGCMGCCCGCGGTAA | crs_42         | 1            | 0                      |     | 0         | 38.58000183      | 30.06999969       | 1   | NA                             | 0           | 1                 | 0              | 0                | 0               |
| 0104.43.01.SINUS | GAGATACAGTTC    | GTGTGYCAGCMGCCCGCGGTAA | crs_43         | 1            | 0                      |     | 0         | 33.22999954      | 22.01000023       | 0   | 0                              | 0           | 1                 | 0              | 0                | 0               |
| 0104.43.02.SINUS | GTGGAGTCTCAT    | GTGTGYCAGCMGCCCGCGGTAA | crs_43         | 2            | 70                     |     | 0         | 33.22999954      | 22.01000023       | 0   | 0                              | 0           | 1                 | 0              | 0                | 0               |
| 0104.43.03.SINUS | ACCTTACACCTT    | GTGTGYCAGCMGCCCGCGGTAA | crs_43         | 3            | 3                      |     |           |                  |                   |     |                                |             |                   |                |                  |                 |

|                  |              |                       |        |   |     |   |             |             |   |   |     |   |   |   |   |
|------------------|--------------|-----------------------|--------|---|-----|---|-------------|-------------|---|---|-----|---|---|---|---|
| 0104.50.02.SINUS | CCTTGACCGATG | GTGTGYCAGCMGCCGCGGTAA | crs_50 | 2 | 308 | 1 | 30.71999931 | 22.11000061 | 0 | 0 | 0.5 | 1 | 0 | 0 | 0 |
| 0104.50.03.SINUS | CAAACGCGTTG  | GTGTGYCAGCMGCCGCGGTAA | crs_50 | 3 | 399 | 1 | 30.71999931 | 22.11000061 | 0 | 0 | 0.5 | 1 | 0 | 0 | 0 |
| 0104.51.01.SINUS | GTTGATACGATG | GTGTGYCAGCMGCCGCGGTAA | crs_51 | 1 | 0   | 1 | 36.16999817 | 18.60000038 | 0 | 0 | 1   | 1 | 0 | 0 | 0 |
| 0104.52.01.SINUS | CTATATATCCG  | GTGTGYCAGCMGCCGCGGTAA | crs_52 | 1 | 0   | 1 | 35.83000183 | 23.03000069 | 1 | 0 | 1   | 0 | 1 | 0 | 1 |
| 0104.52.02.SINUS | ACCGACAATCC  | GTGTGYCAGCMGCCGCGGTAA | crs_52 | 2 | 84  | 1 | 35.83000183 | 23.03000069 | 1 | 0 | 1   | 0 | 1 | 0 | 1 |
| 0104.52.03.SINUS | ACGSTACCTAC  | GTGTGYCAGCMGCCGCGGTAA | crs_52 | 3 | 224 | 1 | 35.83000183 | 23.03000069 | 1 | 0 | 1   | 0 | 1 | 0 | 1 |
| 0104.52.05.SINUS | ACCTACTGTCT  | GTGTGYCAGCMGCCGCGGTAA | crs_52 | 4 | 336 | 1 | 35.83000183 | 23.03000069 | 1 | 0 | 1   | 0 | 1 | 0 | 1 |
| 0104.52.06.SINUS | ACTGTGACGTCC | GTGTGYCAGCMGCCGCGGTAA | crs_52 | 5 | 378 | 1 | 35.83000183 | 23.03000069 | 1 | 0 | 1   | 0 | 1 | 0 | 1 |
| 0104.52.07.SINUS | CATGCTTCCAT  | GTGTGYCAGCMGCCGCGGTAA | crs_52 | 6 | 504 | 1 | 35.83000183 | 23.03000069 | 1 | 0 | 1   | 0 | 1 | 0 | 1 |
| 0104.53.01.SINUS | GTAGTAGACCAT | GTGTGYCAGCMGCCGCGGTAA | crs_53 | 1 | 0   | 1 | 19.67000008 | 20.77000046 | 0 | 0 | 0.5 | 1 | 0 | 0 | 0 |
| 0104.55.01.SINUS | CCTCCGCATGG  | GTGTGYCAGCMGCCGCGGTAA | crs_55 | 1 | 0   | 0 | 40          | 22.20000076 | 1 | 0 | 0.5 | 1 | 1 | 0 | 1 |

| ever_on_top_mupirocin | ever_on_top_cipro | ever_on_nasal_steroid | ever_on_chronic_oral_steroid | sinus_exacerbation | pulmonary_exacerbation | on_nasal_cannula_oxygen | interim_hos | hospital_days | transplant_at_visit | visit_bmi   | samp_loc  | ppFEV1 | ppFEF25-75 | snot22 | mik | sputum_pa |
|-----------------------|-------------------|-----------------------|------------------------------|--------------------|------------------------|-------------------------|-------------|---------------|---------------------|-------------|-----------|--------|------------|--------|-----|-----------|
| 0                     | 0                 | 1                     | 0                            | 0                  | 1                      | 0                       | 0           | NA            | 0                   | 25.4099985  | Maxillary | 94     | NA         | 20     | 6   | NA        |
| 0                     | 0                 | 0                     | 0                            | 0                  | NA                     | NA                      | NA          | NA            | 0                   | NA          | Maxillary | 94     | 74         | 5      | 4   | 0         |
| 0                     | 0                 | 1                     | 0                            | 0                  | NA                     | NA                      | NA          | NA            | 0                   | NA          | Ethmoid   | 101    | 81         | 18     | 0   | 0         |
| 0                     | 0                 | 1                     | 0                            | 0                  | NA                     | NA                      | NA          | NA            | NA                  | NA          | Ethmoid   | 109    | 91         | 9      | 0   | 0         |
| 1                     | 1                 | 0                     | 1                            | 0                  | 0                      | 0                       | 0           | NA            | 1                   | 20.0499924  | Maxillary | 77     | 90         | 61     | 12  | NA        |
| 0                     | 0                 | 0                     | 1                            | 0                  | 1                      | 0                       | NA          | NA            | 0                   | 25.0499924  | Ethmoid   | 66     | 27         | 62     | 10  | 0         |
| 0                     | 0                 | 0                     | 1                            | 0                  | 1                      | 0                       | 1           | 9             | 0                   | 23.4300031  | Ethmoid   | 70     | 31         | 48     | 12  | 0         |
| 0                     | 0                 | 0                     | 1                            | 0                  | 1                      | 0                       | 0           | NA            | 0                   | 22.8099947  | Ethmoid   | 65     | 34         | 34     | 8   | 0         |
| 0                     | 0                 | 0                     | 1                            | 0                  | 0                      | 0                       | 0           | NA            | 0                   | 22.7900092  | Ethmoid   | 63     | 26         | 59     | 8   | 0         |
| 0                     | 0                 | 0                     | 1                            | 0                  | 0                      | 0                       | 0           | NA            | 0                   | 24.7099908  | Ethmoid   | 63     | 29         | 54     | 6   | 0         |
| 0                     | 0                 | 0                     | 1                            | 1                  | 1                      | 0                       | 0           | NA            | 0                   | 25.9500076  | Ethmoid   | 63     | 24         | 54     | 10  | 0         |
| 0                     | 0                 | 0                     | 1                            | 1                  | 1                      | 1                       | 1           | 0             | 0                   | 25.3700084  | Ethmoid   | 66     | 28         | 58     | 10  | 0         |
| 0                     | 0                 | 0                     | 1                            | 0                  | 1                      | 0                       | 1           | 0             | 0                   | 26.4099985  | Ethmoid   | 56     | 21         | 55     | 10  | 0         |
| 0                     | 0                 | 0                     | 1                            | 0                  | 1                      | 0                       | 1           | 0             | 1                   | 18.1000038  | Maxillary | 76     | 62         | 47     | 12  | 0         |
| 1                     | 1                 | 0                     | 0                            | 0                  | 0                      | 0                       | 0           | NA            | 0                   | 28.7600023  | Ethmoid   | 100    | 79         | 67     | 16  | 1         |
| 1                     | 1                 | 0                     | 0                            | 0                  | 0                      | 0                       | 0           | 1             | 10                  | 29.7000076  | Ethmoid   | 92     | 63         | 83     | 16  | 1         |
| 1                     | 1                 | 0                     | 0                            | 0                  | 0                      | 0                       | 1           | 13            | 0                   | 30.8600061  | Ethmoid   | 104    | 70         | 85     | 16  | 1         |
| 1                     | 1                 | 0                     | 0                            | 1                  | 1                      | 0                       | 0           | NA            | 0                   | 33.0900015  | Ethmoid   | 83     | 46         | 83     | 8   | NA        |
| 1                     | 1                 | 0                     | 0                            | 1                  | 0                      | 0                       | 1           | 3             | 0                   | 33.5499924  | Ethmoid   | 101    | 72         | 81     | 8   | 1         |
| 1                     | 1                 | 0                     | 0                            | 1                  | 0                      | 0                       | 0           | NA            | 0                   | 33.91999817 | Ethmoid   | 98     | 79         | 96     | NA  | 1         |
| 1                     | 1                 | 0                     | 0                            | 0                  | 0                      | 0                       | 0           | NA            | 0                   | 19.8799916  | Ethmoid   | 54     | 19         | 30     | 14  | 0         |
| 1                     | 1                 | 0                     | 1                            | 0                  | 0                      | 0                       | 1           | 13            | 0                   | 22.0699969  | Maxillary | 51     | 18         | 18     | 6   | NA        |
| 1                     | 1                 | 0                     | 1                            | 0                  | 1                      | 0                       | 1           | 23            | 0                   | 19.8799916  | Ethmoid   | 47     | 15         | 63     | 8   | 1         |
| 1                     | 1                 | 0                     | 1                            | 0                  | 1                      | 0                       | 0           | NA            | 0                   | 19.3600061  | Maxillary | 71     | 64         | 48     | 8   | 1         |
| 1                     | 1                 | 1                     | 0                            | 1                  | 0                      | 0                       | 0           | NA            | 0                   | 19.0300069  | Maxillary | 66     | 85         | 51     | 4   | 0         |
| 0                     | 0                 | 0                     | 0                            | 1                  | 1                      | 1                       | 0           | NA            | 0                   | NA          | Ethmoid   | 27     | 8          | 43     | 12  | 0         |
| 0                     | 0                 | 0                     | 0                            | 0                  | 1                      | 1                       | 0           | NA            | 0                   | 22.5200046  | Ethmoid   | 27     | 8          | 39     | 8   | 1         |
| 0                     | 0                 | 0                     | 0                            | 0                  | 0                      | 1                       | 0           | NA            | 0                   | 23.1000038  | Ethmoid   | 34     | 10         | 50     | 10  | 1         |
| 0                     | 0                 | 0                     | 0                            | 1                  | 1                      | 1                       | 1           | 4             | 0                   | 21.9400053  | Ethmoid   | 31     | 11         | 49     | 12  | 0         |
| 0                     | 0                 | 0                     | 0                            | 1                  | 1                      | 1                       | 1           | 3             | 0                   | 21.5799992  | Maxillary | 25     | 8          | 40     | 12  | 0         |
| 0                     | 0                 | 0                     | 0                            | 1                  | 1                      | 1                       | 1           | 0             | NA                  | 24.3400015  | Ethmoid   | 30     | 11         | 43     | 10  | 1         |
| 0                     | 0                 | 0                     | 0                            | 0                  | 1                      | 1                       | 1           | 0             | NA                  | 23.0400092  | Ethmoid   | 27     | 10         | 33     | 10  | 1         |
| 0                     | 0                 | 0                     | 0                            | 0                  | 1                      | 1                       | 1           | 0             | NA                  | 23.0400092  | Ethmoid   | 25     | 8          | 45     | 10  | 1         |
| 0                     | 0                 | 0                     | 0                            | 0                  | 1                      | 1                       | 1           | 0             | NA                  | 24.3400015  | Maxillary | 28     | 10         | 26     | 10  | 1         |
| 0                     | 0                 | 0                     | 0                            | 1                  | 1                      | 1                       | 1           | 0             | NA                  | 23.9799954  | Ethmoid   | 21     | 7          | 45     | 12  | 1         |
| 1                     | 1                 | 0                     | 1                            | 0                  | 1                      | 1                       | 1           | NA            | 0                   | 18.4799954  | Ethmoid   | 38     | 42         | 12     | 8   | NA        |
| 1                     | 1                 | 0                     | 1                            | 0                  | 0                      | 1                       | 0           | NA            | 0                   | 17.8500038  | Ethmoid   | 26     | 25         | 30     | 12  | 0         |
| 1                     | 1                 | 0                     | 1                            | 0                  | 1                      | 0                       | 1           | 0             | NA                  | 18.8199969  | Ethmoid   | 27     | 16         | 14     | 8   | 0         |
| 1                     | 1                 | 0                     | 1                            | 1                  | 1                      | 1                       | 0           | NA            | 0                   | 17.8500038  | Ethmoid   | 28     | 18         | 29     | 12  | 0         |
| 1                     | 1                 | 0                     | 1                            | 0                  | 0                      | 0                       | 1           | 6             | 0                   | 19.6900053  | Maxillary | 37     | 35         | 21     | 10  | 0         |
| 1                     | 1                 | 0                     | 1                            | 0                  | 1                      | 1                       | 1           | 4             | 0                   | 18.8199969  | Ethmoid   | 27     | 24         | 26     | 6   | 0         |
| 1                     | 1                 | 0                     | 1                            | 0                  | 0                      | 0                       | 1           | 0             | NA                  | NA          | Ethmoid   | 32     | 28         | 15     | 6   | 0         |
| 1                     | 1                 | 0                     | 1                            | 1                  | 1                      | 1                       | 1           | 0             | NA                  | 18.8199969  | Ethmoid   | 25     | 40         | 18     | 6   | 0         |
| 1                     | 1                 | 0                     | 1                            | 1                  | 1                      | 1                       | 1           | 3             | 0                   | 19.8400015  | Ethmoid   | 22     | 19         | 16     | 8   | 0         |
| 1                     | 1                 | 0                     | 1                            | 0                  | 1                      | 1                       | 0           | NA            | 0                   | 19.6900053  | Ethmoid   | 33     | 10         | 8      | 6   | 0         |
| 0                     | 1                 | 1                     | 1                            | 0                  | 1                      | 0                       | 1           | 3             | 0                   | 22.9500076  | Maxillary | 42     | 14         | 21     | 6   | NA        |
| 1                     | 1                 | 1                     | 0                            | 1                  | 0                      | 0                       | 0           | NA            | 0                   | 19.6800031  | Maxillary | 60     | 32         | 60     | 8   | 1         |
| 1                     | 1                 | 1                     | 0                            | 0                  | 1                      | 0                       | 1           | 1             | 0                   | 20.5599947  | Maxillary | 67     | 34         | 36     | 8   | 1         |
| 1                     | 1                 | 1                     | 0                            | 0                  | 0                      | 0                       | 0           | NA            | 0                   | 19.9599908  | Maxillary | 61     | 30         | 59     | 4   | 1         |
| 1                     | 1                 | 1                     | 0                            | 1                  | 1                      | 0                       | 0           | NA            | 0                   | 19.1900053  | Maxillary | 77     | 18         | 52     | NA  | 1         |
| 1                     | 1                 | 1                     | 0                            | 0                  | 0                      | 0                       | 1           | 5             | 0                   | 19.4400053  | Maxillary | NA     | NA         | 62     | 8   | NA        |
| 1                     | 1                 | 1                     | 0                            | 1                  | 0                      | 0                       | 1           | 10            | 0                   | 17.3199969  | Maxillary | 58     | 25         | 52     | 10  | 1         |
| 1                     | 1                 | 1                     | 0                            | 1                  | 1                      | 1                       | 1           | 0             | NA                  | 17.9500076  | Ethmoid   | 57     | 20         | 74     | 8   | 1         |
| 1                     | 1                 | 1                     | 0                            | 1                  | 0                      | 0                       | 0           | NA            | 0                   | 22.0599947  | Maxillary | 59     | 59         | 0      | 10  | 1         |
| 1                     | 1                 | 1                     | 1                            | 1                  | 0                      | 0                       | 0           | NA            | 0                   | 21.7199931  | Maxillary | 91     | 71         | 0      | 6   | 1         |
| 1                     | 1                 | 1                     | 1                            | 1                  | 1                      | 0                       | 1           | 1             | 0                   | 21.9400053  | Maxillary | 92     | 66         | 0      | 10  | 1         |
| 1                     | 1                 | 1                     | 1                            | 1                  | 1                      | 0                       | 0           | NA            | 0                   | 22.5900015  | Maxillary | 83     | 59         | 0      | 4   | NA        |
| 1                     | 1                 | 1                     | 1                            | 0                  | 1                      | 0                       | 0           | NA            | 0                   | 22.6499962  | Ethmoid   | 81     | 54         | 3      | 4   | 1         |
| 1                     | 1                 | 1                     | 1                            | 0                  | 0                      | 0                       | 0           | NA            | 0                   | 22.25       | Ethmoid   | 83     | 55         | 0      | 3   | 1         |
| 1                     | 1                 | 1                     | 1                            | 0                  | 0                      | 0                       | 0           | NA            | 0                   | NA          | Ethmoid   | 82     | 52         | 1      | 2   | 1         |
| 1                     | 1                 | 1                     | 1                            | 0                  | 0                      | 0                       | 0           | NA            | 0                   | 23.1100061  | Ethmoid   | 94     | 58         | 1      | 4   | 1         |
| 0                     | 0                 | 0                     | 0                            | 0                  | 0                      | 0                       | 0           | NA            | 0                   | 25.0499924  | Maxillary | 94     | 55         | 29     | 6   | 0         |
| 0                     | 0                 | 0                     | 0                            | 0                  | 0                      | 0                       | 0           | NA            | 0                   | 23.8799916  | Maxillary | 92     | 55         | 16     | 6   | 0         |
| 0                     | 0                 | 0                     | 0                            | 0                  | 0                      | 0                       | 0           | NA            | 0                   | 24.2099908  | Maxillary | 91     | 58         | 25     | 6   | NA        |
| 0                     | 0                 | 1                     | 0                            | 1                  | 1                      | 0                       | 0           | NA            | 0                   | 24.6599985  | Ethmoid   | 86     | 49         | 48     | 8   | 0         |
| 0                     | 0                 | 1                     | 0                            | 1                  | 0                      | 0                       | 0           | NA            | 0                   | 24.8099947  | Ethmoid   | 94     | 59         | 37     | 4   | 0         |
| 0                     | 0                 | 1                     | 0                            | 1                  | 0                      | 0                       | 0           | NA            | 0                   | 26.6900053  | Maxillary | 88     | 43         | 47     | 5   | 0         |
| 0                     | 0                 | 1                     | 0                            | 0                  | 0                      | 0                       | 0           | NA            | 0                   | 27.5499924  | Maxillary | 99     | 61         | 40     | 2   | 0         |
| 1                     | 0                 | 1                     | 0                            | 0                  | 0                      | 0                       | 0           | NA            | 0                   | 27.5        | Maxillary | 81     | 59         | 0      | 6   | 0         |
| 1                     | 0                 | 1                     | 0                            | 0                  | 0                      | 0                       | 0           | NA            | 0                   | 28.4799954  | Ethmoid   | 81     | 59         | 1      | 2   | 1         |
| 0                     | 0                 | 0                     | 1                            | 0                  | 1                      | 1                       | 1           | 7             | 0                   | 17.5400092  | Ethmoid   | 30     | 8          | 31     | 7   | 1         |
| 0                     | 0                 | 0                     | 1                            | 0                  | 1                      | 1                       | 1           | 6             | 0                   | 16.5799992  | Maxillary | 27     | 6          | 34     | 8   | 1         |
| 0                     | 0                 | 0                     | 1                            | 0                  | 0                      | 1                       | 1           | 23            | 1                   | 16.5799992  | Maxillary | 59     | 64         | NA     | 8   | 1         |
| 0                     | 0                 | 0                     | 1                            | 0                  | 0                      | 0                       | 0           | NA            | 1                   | 30.0699969  | Ethmoid   | NA     | 7          | NA     | NA  | NA        |
| 0                     | 0                 | 1                     | 0                            | 0                  | 0                      | 0                       | 0           | NA            | 0                   | 22.0100023  | Maxillary | 71     | 19         | 50     | 10  | 0         |
| 0                     | 0                 | 1                     | 0                            | 0                  | 1                      | 1                       | 0           | NA            | 0                   | 22.6599985  | Ethmoid   | 74     | 23         | 38     | 8   | 1         |
| 0                     | 0                 | 1                     | 0                            | 0                  | 1                      | 0                       | 0           | NA            | 0                   | 24.2199931  | Maxillary | 68     | 16         | 25     | 6   | 1         |
| 0                     | 0                 | 1                     | 0                            | 0                  | NA                     | 0                       | 0           | NA            | 0                   | 24.7099908  | Ethmoid   | 84     | 32         | 28     | 9   | 1         |
| 1                     | 1                 | 1                     | 1                            | 1                  | 0                      | 0                       | 0           | NA            | 0                   | 19.9799954  | Maxillary | 76     | 45         | 47     | 8   | 0         |
| 1                     | 1                 | 1                     | 1                            | 1                  | 1                      | 0                       | 0           | NA            | 0                   | 20.0200046  | Ethmoid   | 78     | 43         | 47     | 8   | 0         |
| 1                     | 1                 | 1                     | 1                            | 1                  | 0                      | 0                       | 0           | NA            | 0                   | 19.3099947  | Maxillary | 73     | 45         | 71     | 9   | 1         |
| 1                     | 1                 | 1                     | 1                            | 1                  | 0                      | 0                       | 0           | NA            | 0                   | 20.1200084  | Ethmoid   | 74     | 39         | 53     | 6   | 1         |
| 1                     | 0                 | 1                     | 0                            | 1                  | 0                      | 1                       | 0           | NA            | 1                   | 19.5900015  | Frontal   | 62     | 25         | 13     | 8   | 0         |
| 1                     | 0                 | 1                     | 0                            | 0                  | 0                      | 0                       | 1           | 1             | 0                   | 18.9799954  | Maxillary | 59     | 20         | 6      | 0   | 0         |
| 1                     | 0                 | 1                     | 0                            | 0                  | 0                      | 0                       | 0           | NA            | 0                   | 20.0499924  | Maxillary | 54     | 17         | 13     | 9   | 1         |
| 0                     | 0                 | 0                     | 0                            | 1                  | 1                      | 0                       | 0           | NA            | 0                   | 34          | Ethmoid   | 65     | 40         | 67     | 10  | 0         |
| 1                     | 0                 | 1                     | 0                            | 1                  | 1                      | 0                       | 0           | NA            | 0                   | 17.8899939  | Ethmoid   | 51     | 16         | 50     | 12  | 0         |
| 1                     | 0                 | 1                     | 0                            | 0                  | 1                      | 0                       | 1           | 8             | 0                   | 17.5300069  | Maxillary | 54     | 18         | 29     | 8   | 0         |
| 1                     | 0                 | 0                     | 0                            | 0                  | 0                      | 0                       | 0           | NA            | 0                   | 26.25       | Maxillary | NA     | NA         | 17     | NA  | NA        |
| 0                     | 0                 | 1                     | 0                            | 0                  | 0                      | 1                       | 0           | NA            | 0                   | 22.1100061  | Frontal   | 34     | 12         | 22     | 9   | 1         |

|   |   |   |   |   |   |   |    |    |   |            |           |    |    |    |    |    |
|---|---|---|---|---|---|---|----|----|---|------------|-----------|----|----|----|----|----|
| 0 | 0 | 1 | 0 | 0 | 0 | 1 | 0  | NA | 0 | 23.0400092 | Maxillary | 34 | 8  | 22 | 10 | 0  |
| 0 | 0 | 1 | 0 | 0 | 0 | 1 | 0  | NA | 0 | 22.1100061 | Ethmoid   | 32 | 10 | 24 | 10 | 0  |
| 0 | 0 | 0 | 0 | 0 | 0 | 0 | 0  | NA | 0 | NA         | Maxillary | 64 | 36 | 30 | 8  | 1  |
| 1 | 1 | 1 | 0 | 0 | 0 | 0 | 0  | NA | 0 | 23.0300069 | Maxillary | 56 | 30 | 58 | 8  | 1  |
| 1 | 1 | 1 | 0 | 0 | 0 | 0 | 0  | NA | 0 | 24.0599947 | Ethmoid   | 62 | 31 | 41 | 4  | 1  |
| 1 | 1 | 1 | 0 | 0 | 0 | 0 | 0  | NA | 0 | 23.7999924 | Ethmoid   | 56 | 27 | 47 | 4  | NA |
| 1 | 1 | 1 | 0 | 0 | 0 | 0 | 0  | NA | 0 | 23.7999924 | Maxillary | NA | NA | 36 | 6  | NA |
| 1 | 1 | 1 | 0 | 0 | 0 | 0 | 0  | NA | 0 | 23.7999924 | Ethmoid   | NA | NA | 34 | 6  | NA |
| 1 | 1 | 1 | 0 | 0 | 0 | 0 | 0  | NA | 0 | 23.7999924 | Ethmoid   | NA | NA | 34 | 6  | NA |
| 0 | 0 | 1 | 0 | 0 | 0 | 0 | 0  | NA | 0 | 30.4799954 | Maxillary | 81 | 63 | 8  | 8  | 1  |
| 0 | 1 | 0 | 1 | 0 | 0 | 0 | NA | NA | 0 | 22.2000076 | Ethmoid   | 76 | 11 | 60 | 10 | 1  |







| oral_sulfa | oral_doxy | oral_other | oral_blactam | days_IVs | current_course | days_oral_abx_currentcourse | is_patient_currently_on_abx | days_on_current_abx | days_iv_abx_since_last_visit | days_of_oral_since_last_visit | il_1b    | il_6   | infbeta | il_19    | ifn_lambda2 | il_29  | pentraxin_3 |
|------------|-----------|------------|--------------|----------|----------------|-----------------------------|-----------------------------|---------------------|------------------------------|-------------------------------|----------|--------|---------|----------|-------------|--------|-------------|
| 1          | 1         | 0          | 0            | NA       | 112            | 1                           | 1                           | 112                 | 0                            | 112                           | 1060.17  | 6.9    | 15.24   | 7.85     | 4.93        | 12.74  | 1192.07     |
| 0          | 0         | 0          | 0            | NA       | NA             | NA                          | NA                          | NA                  | NA                           | NA                            | NA       | NA     | NA      | NA       | NA          | NA     | NA          |
| 0          | 0         | 0          | 0            | NA       | NA             | NA                          | NA                          | NA                  | NA                           | NA                            | NA       | NA     | NA      | NA       | NA          | NA     | NA          |
| 0          | 0         | 0          | 0            | NA       | NA             | NA                          | NA                          | NA                  | NA                           | NA                            | NA       | NA     | NA      | NA       | NA          | NA     | NA          |
| 0          | 1         | 0          | 1            | NA       | 0              | 0                           | 0                           | 28                  | NA                           | 28                            | NA       | NA     | NA      | NA       | NA          | NA     | NA          |
| 0          | 0         | 0          | 0            | NA       | NA             | 0                           | 0                           | NA                  | NA                           | NA                            | NA       | NA     | NA      | NA       | NA          | NA     | NA          |
| 0          | 0         | 0          | 0            | NA       | 17             | NA                          | 1                           | 17                  | 49                           | 0                             | 1069.06  | 6.9    | 14.95   | 11.24    | 7.24        | 18.37  | 960.69      |
| 0          | 0         | 0          | 0            | NA       | 23             | NA                          | 1                           | 23                  | 35                           | 0                             | 49.38    | 2.14   | 14.37   | 14.24    | 2.6         | 12.74  | 637.03      |
| 0          | 0         | 0          | 0            | NA       | NA             | 0                           | 0                           | NA                  | 7                            | 0                             | 111.5    | 15.4   | 6.18    | 282.31   | 8.01        | 1.17   | 2351.7      |
| 1          | 0         | 0          | 0            | 0        | 0              | 0                           | 0                           | NA                  | 30                           | 28                            | 3164.37  | 9.31   | 16.69   | 9.36     | 6.47        | 15.56  | 1742.14     |
| 0          | 0         | 0          | 0            | NA       | 0              | 0                           | 0                           | NA                  | 25                           | 0                             | NA       | NA     | NA      | NA       | NA          | NA     | NA          |
| 0          | 0         | 0          | 0            | NA       | 14             | NA                          | 1                           | 14                  | 32                           | 0                             | NA       | NA     | NA      | NA       | NA          | NA     | NA          |
| 0          | 0         | 0          | 0            | 0        | 0              | 0                           | 0                           | NA                  | 7                            | 14                            | NA       | NA     | NA      | NA       | NA          | NA     | NA          |
| 0          | 0         | 0          | 0            | NA       | NA             | 0                           | 0                           | NA                  | 42                           | NA                            | 114.62   | 40.62  | 10.87   | 213.93   | 4.54        | 14.16  | 2526.53     |
| 0          | 0         | 0          | 0            | NA       | NA             | 0                           | 0                           | NA                  | NA                           | NA                            | NA       | NA     | NA      | NA       | NA          | NA     | NA          |
| 0          | 0         | 0          | 0            | NA       | NA             | 0                           | 0                           | NA                  | 0                            | 0                             | 615.05   | 80.24  | 14.95   | 16.61    | 5.7         | 21.17  | 1821.09     |
| 0          | 0         | 0          | 0            | NA       | NA             | 0                           | 0                           | NA                  | 0                            | 0                             | 1862.1   | 47.75  | 11.46   | 452.13   | 6.47        | 19.77  | 2009.02     |
| 0          | 0         | 0          | 0            | NA       | 8              | NA                          | 1                           | 8                   | 0                            | 8                             | NA       | NA     | NA      | NA       | NA          | NA     | NA          |
| 0          | 0         | 0          | 0            | NA       | NA             | 0                           | 0                           | NA                  | 0                            | 14                            | NA       | NA     | NA      | NA       | NA          | NA     | NA          |
| 0          | 0         | 0          | 0            | NA       | NA             | 0                           | 0                           | NA                  | 0                            | 0                             | NA       | NA     | NA      | NA       | NA          | NA     | NA          |
| 0          | 0         | 0          | 0            | NA       | NA             | 0                           | 0                           | NA                  | NA                           | NA                            | NA       | NA     | NA      | NA       | NA          | NA     | NA          |
| 0          | 1         | 0          | 0            | NA       | NA             | 0                           | 0                           | NA                  | 14                           | 14                            | 2128.04  | 9.31   | 16.98   | 15.05    | 7.24        | 21.17  | 1358.57     |
| 0          | 0         | 0          | 0            | NA       | NA             | 0                           | 0                           | NA                  | 24                           | 94                            | NA       | NA     | NA      | NA       | NA          | NA     | NA          |
| 0          | 1         | 0          | 0            | NA       | 0              | 0                           | 0                           | NA                  | 35                           | 35                            | 7.38     | 9.72   | 14.95   | 8.87     | 4.15        | 9.9    | 95.39       |
| 1          | 1         | 0          | 0            | NA       | 56             | 1                           | 1                           | 56                  | 0                            | 56                            | NA       | NA     | NA      | NA       | NA          | NA     | NA          |
| 0          | 0         | 0          | 0            | NA       | NA             | 0                           | 0                           | NA                  | 21                           | 0                             | 6137.29  | 33.94  | 17.84   | 23.69    | 8.01        | 12.74  | 1695.74     |
| 0          | 0         | 0          | 0            | NA       | NA             | 0                           | 0                           | NA                  | 0                            | 0                             | 48       | 7.7    | 12.04   | 10.78    | 3.38        | 9.9    | 699.34      |
| 0          | 1         | 1          | 0            | NA       | NA             | 0                           | 0                           | NA                  | 14                           | 14                            | 963.52   | 8.91   | 17.27   | 27.22    | 6.86        | 15.56  | 1400.09     |
| 0          | 0         | 0          | 0            | NA       | 12             | NA                          | 1                           | 12                  | 20                           | 0                             | 106.38   | 26.48  | 6.77    | 1569.81  | 4.15        | 4.14   | 2165.42     |
| 0          | 0         | 0          | 0            | NA       | NA             | 0                           | 0                           | NA                  | 44                           | 6                             | 2813.23  | 17.23  | 9.71    | 18.85    | 4.93        | 4.14   | 1567.41     |
| 0          | 0         | 0          | 0            | NA       | 22             | NA                          | 1                           | 22                  | 14                           | 14                            | NA       | NA     | NA      | NA       | NA          | NA     | NA          |
| 0          | 0         | 0          | 0            | NA       | NA             | 0                           | 0                           | NA                  | 44                           | 0                             | NA       | NA     | NA      | NA       | NA          | NA     | NA          |
| 0          | 0         | 0          | 0            | NA       | NA             | 0                           | 0                           | NA                  | 0                            | 0                             | NA       | NA     | NA      | NA       | NA          | NA     | NA          |
| 0          | 0         | 0          | 0            | NA       | 20             | NA                          | 1                           | 20                  | 0                            | 0                             | NA       | NA     | NA      | NA       | NA          | NA     | NA          |
| 0          | 0         | 0          | 0            | NA       | NA             | 0                           | 0                           | NA                  | 35                           | 0                             | NA       | NA     | NA      | NA       | NA          | NA     | NA          |
| 0          | 0         | 0          | 0            | NA       | 16             | NA                          | 1                           | 16                  | 65                           | 0                             | 278.7    | 14.99  | 19.58   | 14.24    | 6.47        | 18.37  | 945.22      |
| 0          | 1         | 0          | 0            | NA       | NA             | 0                           | 0                           | NA                  | 0                            | 28                            | 801.7    | 59.57  | 19      | 27.53    | 7.63        | 21.17  | 1726.63     |
| 0          | 1         | 0          | 0            | NA       | NA             | 0                           | 0                           | NA                  | 18                           | 18                            | 154.64   | 12.55  | 23.33   | 20.98    | 8.78        | 23.95  | 1558.75     |
| 0          | 0         | 0          | 0            | NA       | 16             | NA                          | NA                          | NA                  | NA                           | NA                            | 910.53   | 21.12  | 19      | 75.4     | 7.24        | 23.95  | 2269.72     |
| 0          | 1         | 0          | 0            | NA       | NA             | 0                           | 0                           | NA                  | 48                           | 48                            | 839.66   | 9.52   | 17.27   | 9.85     | 5.7         | 18.37  | 1046.28     |
| 0          | 0         | 0          | 0            | NA       | 9              | NA                          | 1                           | 9                   | 9                            | 41                            | NA       | NA     | NA      | NA       | NA          | NA     | NA          |
| 0          | 0         | 0          | 0            | NA       | NA             | 0                           | 0                           | NA                  | 10                           | 10                            | NA       | NA     | NA      | NA       | NA          | NA     | NA          |
| 0          | 1         | 0          | 0            | NA       | NA             | 0                           | 0                           | NA                  | 0                            | 0                             | NA       | NA     | NA      | NA       | NA          | NA     | NA          |
| 0          | 0         | 0          | 0            | NA       | 10             | NA                          | 1                           | 10                  | 0                            | 0                             | NA       | NA     | NA      | NA       | NA          | NA     | NA          |
| 0          | 0         | 0          | 0            | NA       | NA             | 0                           | 0                           | NA                  | 15                           | 15                            | NA       | NA     | NA      | NA       | NA          | NA     | NA          |
| 0          | 0         | 0          | 0            | NA       | NA             | 0                           | 0                           | NA                  | 35                           | 0                             | NA       | NA     | NA      | NA       | NA          | NA     | NA          |
| 0          | 0         | 0          | 0            | NA       | NA             | 0                           | 0                           | NA                  | 0                            | 0                             | 4089.93  | 751.02 | 62.92   | 2981.32  | 554.38      | 33.63  | 4170.55     |
| 1          | 0         | 0          | 0            | NA       | 6              | NA                          | 1                           | 6                   | 0                            | 0                             | 797.35   | 12.55  | 3.22    | 1212.73  | 3.38        | 12.74  | 1548.23     |
| 1          | 0         | 0          | 0            | NA       | NA             | 0                           | 0                           | NA                  | 0                            | 10                            | 143.77   | 11.13  | 4.7     | 180.71   | 4.15        | 9.9    | 991.1       |
| 0          | 0         | 0          | 0            | NA       | NA             | 0                           | 0                           | NA                  | 0                            | 14                            | 110.02   | 11.74  | 5       | 69.47    | 4.15        | 11.32  | 456.37      |
| 0          | 0         | 0          | 0            | NA       | NA             | 0                           | 0                           | NA                  | 8                            | 14                            | 1341.94  | 6.1    | 7.36    | 11.24    | 5.7         | 12.74  | 1357.12     |
| 0          | 0         | 0          | 0            | NA       | NA             | 0                           | 0                           | NA                  | 10                           | 14                            | NA       | NA     | NA      | NA       | NA          | NA     | NA          |
| 0          | 0         | 0          | 0            | NA       | NA             | 0                           | 0                           | NA                  | 0                            | 0                             | NA       | NA     | NA      | NA       | NA          | NA     | NA          |
| 0          | 0         | 0          | 0            | NA       | NA             | 0                           | 0                           | NA                  | 0                            | 0                             | 6.66     | 1.36   | 11.46   | 39.05    | 1.91        | 7.04   | 158.85      |
| 0          | 0         | 0          | 0            | NA       | NA             | 0                           | 0                           | NA                  | NA                           | NA                            | 486.93   | 23.59  | 2.62    | 3321.42  | 4.15        | 4.14   | 771.85      |
| 0          | 1         | 0          | 0            | NA       | 0              | NA                          | 1                           | 0                   | 0                            | NA                            | 1310.68  | 451.58 | 11.75   | 20802.16 | 13.37       | 32.26  | 1897.94     |
| 0          | 0         | 0          | 0            | NA       | NA             | 0                           | 0                           | NA                  | 14                           | NA                            | 3.34     | 2.93   | 12.04   | 187.18   | 2.6         | 7.04   | 119.27      |
| 0          | 0         | 0          | 0            | NA       | NA             | 1                           | 0                           | 21                  | 21                           | NA                            | 19.27    | 14.99  | 18.42   | 12.56    | 5.7         | 15.56  | 430.91      |
| 0          | 0         | 0          | 0            | NA       | NA             | 0                           | 0                           | NA                  | 28                           | NA                            | 84.66    | 20.3   | 5.59    | 1718.51  | 3.38        | 7.04   | 741.11      |
| 0          | 0         | 0          | 0            | NA       | NA             | 0                           | 0                           | NA                  | 0                            | NA                            | NA       | NA     | NA      | NA       | NA          | NA     | NA          |
| 0          | 0         | 0          | 0            | NA       | NA             | 0                           | 0                           | NA                  | NA                           | NA                            | NA       | NA     | NA      | NA       | NA          | NA     | NA          |
| 0          | 0         | 0          | 0            | NA       | NA             | 0                           | 0                           | NA                  | NA                           | NA                            | 823.65   | 8.51   | 14.37   | 8.87     | 6.09        | 15.56  | 953.96      |
| 0          | 0         | 0          | 0            | NA       | NA             | 0                           | 0                           | NA                  | 0                            | 0                             | 46.34    | 5.9    | 17.27   | 9.85     | 4.93        | 15.56  | 506.79      |
| 1          | 0         | 0          | 0            | NA       | NA             | 0                           | 0                           | NA                  | 0                            | 14                            | 34.98    | 19.48  | 12.04   | 733.37   | 5.7         | 21.17  | 2173.76     |
| 0          | 0         | 0          | 0            | NA       | NA             | 0                           | 0                           | NA                  | 0                            | 28                            | 97.56    | 25.65  | 6.18    | 203.53   | 3.38        | 9.9    | 1107.58     |
| 1          | 0         | 0          | 0            | NA       | NA             | 0                           | 0                           | NA                  | 0                            | 14                            | NA       | NA     | NA      | NA       | NA          | NA     | NA          |
| 0          | 0         | 0          | 0            | NA       | 0              | NA                          | 0                           | NA                  | 0                            | 0                             | NA       | NA     | NA      | NA       | NA          | NA     | NA          |
| 1          | 1         | 0          | 0            | NA       | 0              | NA                          | 0                           | NA                  | 42                           | 42                            | 757.86   | 9.11   | 14.08   | 7.85     | 4.15        | 11.32  | 1349.87     |
| 0          | 0         | 0          | 0            | NA       | NA             | 0                           | 0                           | NA                  | 0                            | NA                            | 219.42   | 12.95  | 5.59    | 177.6    | 4.15        | 1.17   | 1213.23     |
| 0          | 0         | 0          | 0            | NA       | NA             | 0                           | 0                           | NA                  | 50                           | NA                            | 70.63    | 13.16  | 3.22    | 578.83   | 3.38        | 980.28 | 1140.24     |
| 0          | 0         | 0          | 0            | NA       | 6              | NA                          | 1                           | 6                   | 6                            | 14                            | NA       | NA     | NA      | NA       | NA          | NA     | NA          |
| 0          | 0         | 0          | 0            | NA       | 54             | NA                          | 0                           | NA                  | 0                            | 0                             | NA       | NA     | NA      | NA       | NA          | NA     | NA          |
| 0          | 0         | 0          | 0            | NA       | NA             | 0                           | 0                           | NA                  | NA                           | NA                            | NA       | NA     | NA      | NA       | NA          | NA     | NA          |
| 0          | 0         | 0          | 1            | NA       | 0              | NA                          | 0                           | NA                  | NA                           | NA                            | 12024.87 | 8.91   | 13.2    | 10.78    | 6.47        | 18.37  | 1360.02     |
| 0          | 0         | 0          | 1            | NA       | 19             | NA                          | 1                           | 19                  | 40                           | 40                            | 1413.6   | 8.91   | 12.62   | 18.85    | 7.24        | 15.56  | 1891.56     |
| 0          | 0         | 0          | 1            | NA       | NA             | 0                           | 0                           | NA                  | 26                           | 14                            | 7076.08  | 21.33  | 10.29   | 15.84    | 8.01        | 15.56  | 1930.72     |
| 0          | 0         | 0          | 0            | NA       | NA             | 0                           | 0                           | NA                  | 42                           | NA                            | NA       | NA     | NA      | NA       | NA          | NA     | NA          |
| 0          | 0         | 0          | 0            | NA       | 40             | NA                          | 0                           | NA                  | NA                           | NA                            | 24.99    | 4.51   | 7.36    | 346.04   | 3.38        | 9.9    | 543.2       |
| 0          | 0         | 0          | 0            | NA       | 40             | NA                          | 1                           | 40                  | 28                           | 28                            | 6.35     | 8.11   | 0.19    | 1681.65  | 4.15        | 9.9    | 292.89      |
| 0          | 0         | 0          | 0            | NA       | NA             | 0                           | 0                           | NA                  | 7                            | 0                             | 0.06     | 1.36   | 12.04   | 7.85     | 1.02        | 7.04   | 53.7        |
| 0          | 1         | 1          | 0            | NA       | NA             | 0                           | 0                           | NA                  | 28                           | 28                            | NA       | NA     | NA      | NA       | NA          | NA     | NA          |
| 0          | 0         | 0          | 0            | NA       | 20             | NA                          | 1                           | 20                  | NA                           | NA                            | 32.95    | 15.8   | 24.76   | 20.28    | 14.13       | 43.23  | 861.27      |
| 0          | 1         | 0          | 0            | NA       | 0              | NA                          | 0                           | NA                  | 45                           | 45                            | 366.58   | 8.71   | 14.37   | 7.85     | 4.93        | 12.74  | 1267.9      |
| 0          | 0         | 0          | 0            | NA       | NA             | 0                           | 0                           | NA                  | 21                           | NA                            | NA       | NA     | NA      | NA       | NA          | NA     | NA          |
| 0          | 0         | 0          | 0            | NA       | NA             | 1                           | 0                           | 6                   | NA                           | NA                            | 1006.48  | 20.3   | 13.2    | 18.85    | 7.24        | 9.9    | 1438.6      |
| 0          | 0         | 0          | 0            | NA       | NA             | 0                           | 0                           | NA                  | 16                           | 14                            | 334.56   | 8.11   | 21.02   | 275.13   | 5.7         | 12.74  | 1051.07     |
| 0          | 0         | 0          | 0            | NA       | NA             | 0                           | 0                           | NA                  | 16                           | 14                            | 66.85    | 36.44  | 12.62   | 10.78    | 4.93        | 9.9    | 1272.19     |
| 0          | 0         | 0          | 0            | NA       | NA             | 0                           | 0                           | NA                  | NA                           | NA                            | NA       | NA     | NA      | NA       | NA          | NA     | NA          |
| 0          | 1         | 0          | 0            | NA       | NA             | NA                          | NA                          | NA                  | NA                           | NA                            | 94.12    | 12.14  | 9.12    | 13.41    | 5.7         | 15.56  | 751.44      |



Supplemental table 5. Codebook describing each variable in the metadata. See Supplemental table 4 for the metadata.

| Variable                       | Description                                                                                                                                 |
|--------------------------------|---------------------------------------------------------------------------------------------------------------------------------------------|
| SampleID                       | Unique name for the 16S amplicon sequencing sample                                                                                          |
| BarcodeSequence                | Sequence of the barcode                                                                                                                     |
| LinkerPrimerSequence           | Sequence of the linker primer                                                                                                               |
| participant_id                 | The study participant's unique ID number                                                                                                    |
| visit_number                   | Numerical order of visits for each participant (ascending)                                                                                  |
| days_since_first_visit         | Count of the number of visits since enrollment (Day 0)                                                                                      |
| sex_is_female                  | male = 0, female = 1                                                                                                                        |
| age_onenrollment               | in years                                                                                                                                    |
| BMI_on_enrollment              | mg/kg <sup>2</sup>                                                                                                                          |
| cfd                            | prior diagnosis of CF-related diabetes; 0 = no, 1 = yes                                                                                     |
| transplant_prior_to_enrollment | prior LUNG transplant at day of enrollment, no = 0, yes = 1. Note that one subject gets a transplant during the study                       |
| hmzg_mut508                    | homozygous = 0, heterozygous = 1, other mutations = 2, missing = NA                                                                         |
| allergic_rhinitis              | no = 0, yes = 1                                                                                                                             |
| ever_on_topabx                 | Is the subject on topical antibiotics at ANY TIME during the study, no = 0, yes = 1                                                         |
| ever_on_topvanco               | If the subject on specific topical antibiotics at ANY TIME during the study, no = 0, yes = 1                                                |
| ever_on_topgent                | If the subject on specific topical antibiotics at ANY TIME during the study, no = 0, yes = 1                                                |
| ever_on_top_mupirocin          | If the subject on specific topical antibiotics at ANY TIME during the study, no = 0, yes = 1                                                |
| ever_on_top_cipro              | If the subject on specific topical antibiotics at ANY TIME during the study, no = 0, yes = 1                                                |
| ever_on_nasal_steroid          | Is the subject on a nasal steroid at ANY TIME during the study? no = 0, yes = 1                                                             |
| ever_on_chronic_oral_steroid   | Is the subject on chronic oral prednisone during the study? no = 0, yes = 1                                                                 |
| sinus_exacerbation             | Is this an unscheduled visit because of worse sinus disease? no = 0, yes = 1                                                                |
| pulmonary_exacerbation         | Have they been treated for a CF pulmonary exacerbation in the month surrounding the study visit (+/- 4 weeks on each side)? no = 0, yes = 1 |
| on_nasal_cannula_oxygen        | no = 0, yes = 1                                                                                                                             |
| interim_hos                    | no = 0, yes = 1                                                                                                                             |
| hospital_days                  | if yes to interim_hospitalization, then this is the number of days in the hospital since the last visit                                     |
| transplant_at_visit            | transplant status on DAY OF VISIT no = 0, yes = 1                                                                                           |
| visit_bmi                      | mg/kg <sup>2</sup>                                                                                                                          |
| samp_loc                       | the site in the sinus cavity where the sample taken from                                                                                    |
| ppFEV1                         | % predicted FEV1 (theoretical max is about 110%, min around 25%)                                                                            |
| ppFEF25-75                     | % predicted FEF25-75                                                                                                                        |
| snot22                         | sinus symptom scale 0-100. people without sinus disease score 0-7 points                                                                    |
| mik                            | endoscopy visual severity score, modified lund kennedy scale, normal = 0, maximally severe disease = 16                                     |
| sputum_pa                      | Was Pseudomonas aeruginosa grown from the sputum at this visit (or within 1 month, from the medical records); n = 0, yes = 1.               |
| sputum_staph                   | Was Staphylococcus aureus grown from the sputum at this visit (or within 1 month, from the medical records); n = 0, yes = 1.                |
| sinus_staph                    | Was Pseudomonas aeruginosa grown from the sinuses at this visit (or within 1 month, from the medical records); n = 0, yes = 1.              |
| sinus_pa                       | Was Staphylococcus aureus grown from the sinuses at this visit (or within 1 month, from the medical records); n = 0, yes = 1.               |
| current_topabx                 | is the subject currently on topical sinus rinses, no = 0, yes = 1                                                                           |
| current_top_vanco              | if the subject is on rinses, which drug, no = 0, yes = 1                                                                                    |
| current_top_gent               | if the subject is on rinses, which drug, no = 0, yes = 1                                                                                    |
| current_top_mupirocin          | if the subject is on rinses, which drug, no = 0, yes = 1                                                                                    |
| current_top_ciprodex           | if the subject is on rinses, which drug, no = 0, yes = 1                                                                                    |
| is_subject_on_systemic_abx     | is the subject currently on systemic antibiotics (oral or IV). From retrospective chart review.                                             |
| IV_vanco                       | if the subject is on systemic antibiotics, which one, no=0, yes=1, these are by drug class. From retrospective chart review.                |
| IV_gent                        | if the subject is on systemic antibiotics, which one, no=0, yes=1, these are by drug class. From retrospective chart review.                |
| IV_pip-lazo                    | if the subject is on systemic antibiotics, which one, no=0, yes=1, these are by drug class. From retrospective chart review.                |
| IV_cephalosporin               | if the subject is on systemic antibiotics, which one, no=0, yes=1, these are by drug class. From retrospective chart review.                |
| IV_carbepenem                  | if the subject is on systemic antibiotics, which one, no=0, yes=1, these are by drug class. From retrospective chart review.                |
| IV_colistin                    | if the subject is on systemic antibiotics, which one, no=0, yes=1, these are by drug class. From retrospective chart review.                |
| IV_cipro                       | if the subject is on systemic antibiotics, which one, no=0, yes=1, these are by drug class. From retrospective chart review.                |
| IV_aztreonam                   | if the subject is on systemic antibiotics, which one, no=0, yes=1, these are by drug class. From retrospective chart review.                |
| oral_linezolid                 | if the subject is on systemic antibiotics, which one, no=0, yes=1, these are by drug class. From retrospective chart review.                |
| oral_cipro                     | if the subject is on systemic antibiotics, which one, no=0, yes=1, these are by drug class. From retrospective chart review.                |
| oral_clinda                    | if the subject is on systemic antibiotics, which one, no=0, yes=1, these are by drug class. From retrospective chart review.                |
| oral_sulfa                     | if the subject is on systemic antibiotics, which one, no=0, yes=1, these are by drug class. From retrospective chart review.                |
| oral_doxy                      | if the subject is on systemic antibiotics, which one, no=0, yes=1, these are by drug class. From retrospective chart review.                |
| oral_other                     | if the subject is on systemic antibiotics, which one, no=0, yes=1, these are by drug class. From retrospective chart review.                |
| oral_blactam                   | if the subject is on systemic antibiotics, which one, no=0, yes=1, these are by drug class. From retrospective chart review.                |
| days_IVs_current_course        | days of IV therapy as of visit in current course. From retrospective chart review.                                                          |
| days_oral_abx_currentcourse    | days of oral therapy as of visit in current course. From retrospective chart review.                                                        |
| is_patient_currently_on_abx    | is the subject on IV abx AT THE DAY OF VISIT                                                                                                |
| days_on_current_abx            | days on antibiotics as of the visit                                                                                                         |
| days_iv_abx_since_last_visit   | total number of days on IV abx since last visit                                                                                             |
| days_of_oral_since_last_visit  | total number of days on oral abx since last visit.                                                                                          |
| il_1b                          | continuous variable (pg/mL)                                                                                                                 |
| il_6                           | continuous variable (pg/mL)                                                                                                                 |
| infbeta                        | continuous variable (pg/mL)                                                                                                                 |
| il_19                          | continuous variable (pg/mL)                                                                                                                 |
| ifn_lambda2                    | continuous variable (pg/mL)                                                                                                                 |
| il_29                          | continuous variable (pg/mL)                                                                                                                 |
| pentraxin_3                    | continuous variable (pg/mL)                                                                                                                 |
